# Supplementary material for: Realization of nitroaromatic chromophores with intense two-photon brightness
Source: Royal Society of Chemistry journal article supplement (doi:10.1039/d3cc03347c), 2023-01-01

## Supporting Information

### *Realization of nitroaromatic chromophores with intense two-photon brightness*

Bartłomiej Sadowski,<sup>a\*</sup> Marzena Kaliszewska,<sup>b</sup> Guillaume Clermont,<sup>c</sup> Yevgen M. Poronik,<sup>d</sup>  
Mireille Blanchard-Desce,<sup>c\*</sup> Piotr Piątkowski<sup>b\*</sup> and Daniel T. Gryko<sup>d\*</sup>

<sup>a</sup> *Centre of New Technologies, University of Warsaw, S. Banacha 2c, 02-097 Warsaw, Poland.*

*E-mail: b.sadowski@cent.uw.edu.pl*

<sup>b</sup> *Department of Chemistry, University of Warsaw, Zwirki i Wigury 101, 02-089 Warsaw, Poland.*

*E-mail: piatek@chem.uw.edu.pl*

<sup>c</sup> *Univ. Bordeaux, ISM (UMR5255 CNRS), 33400, Bordeaux, France.*

*E-mail: mireille.blanchard-desce@u-bordeaux.fr*

<sup>d</sup> *Institute of Organic Chemistry, Polish Academy of Sciences, Kasprzaka 44/52, 01-224 Warsaw, Poland.*

*E-mail: dtgryko@icho.edu.pl*

## Table of contents

|                                                                        |    |
|------------------------------------------------------------------------|----|
| 1. Experimental part.....                                              | 3  |
| 2. Spectroscopic measurements .....                                    | 13 |
| 3. Two-photon absorption measurements.....                             | 26 |
| 4. $^1\text{H}$ and $^{13}\text{C}$ NMR spectra of new compounds. .... | 30 |

## 1. Experimental part

**General Remarks.** All reagents and solvents were purchased from commercial sources and were used as received unless otherwise noted. Reagent grade solvents ( $\text{CH}_2\text{Cl}_2$ , hexanes) were distilled prior to use. Toluene was dried by distillation over sodium and stored under argon. Transformations with moisture- and oxygen-sensitive compounds were performed under a stream of argon. The reaction progress was monitored by means of thin-layer chromatography (TLC), which was performed on aluminum foil plates, covered with silica gel 60 F254. Product purifications were done by means of column chromatography with Kieselgel 60. The identity and purity of prepared compounds were proved by  $^1\text{H}$  NMR and  $^{13}\text{C}$  NMR spectroscopies as well as by mass spectrometry (via EI-MS or ESI-MS/APCI). HRMS (ESI-TOF/APCI) and HRMS (EI): double-focusing magnetic sector instruments with EBE geometry were utilized. NMR spectra were measured on 400, 500 or 600 MHz instruments. Chemical shifts ( $\delta$ , ppm) were determined with  $\text{CDCl}_3$  as the internal reference;  $J$  values are given in Hz. All melting points for crystalline products were measured with an automated melting point apparatus and are given without correction. Compounds **1**<sup>1</sup>, **2**<sup>2</sup>, **3**,<sup>3</sup> **11**<sup>3</sup> and **12**<sup>3</sup> were synthesized as described earlier.

---

<sup>1</sup> M. Grzybowski, I. Deperasińska, M. Chotkowski, M. Banasiewicz, A. Makarewicz, B. Kozankiewicz, D. T. Gryko, *Chem. Commun.* **2016**, 52, 5108-5111.

<sup>2</sup> B. Sadowski, M. F. Rode, D. T. Gryko, *Chem. Eur. J.* **2018**, 24, 855-864.

<sup>3</sup> B. Sadowski *et al.* *Chem. Sci.* **2021**, 12, 14039-14049.

## Synthesis of commercially unavailable bromoarenes.

### 2-Bromo-1,3-dimethyl-5-nitrobenzene.

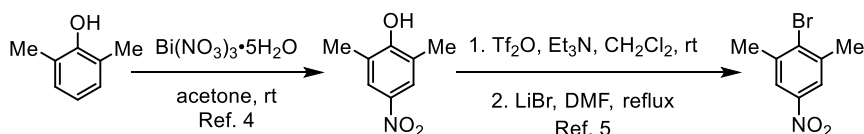

The title compound was prepared according to a depicted above, three step synthesis starting from 2,6-dimethylphenol.<sup>4,5</sup>  $^1\text{H}$  NMR (500 MHz,  $\text{CDCl}_3$ , 25 °C)  $\delta$  7.92 (s, 2H), 2.51 (s, 6H).  $^{13}\text{C}$  NMR (126 MHz,  $\text{CDCl}_3$ , 25 °C)  $\delta$  146.4, 140.2, 135.0, 122.6, 24.2. Anal. calcd for  $\text{C}_{10}\text{H}_6\text{NO}_2\text{Br}$ : C, 41.77; H, 3.51; N, 6.09; Br, 34.73; found: C, 41.97; H, 3.55; N, 5.95; Br, 34.69. HRMS (EI) calcd for  $\text{C}_8\text{H}_8\text{BrNO}_2$  228.9738 [ $\text{M}^+$ ], found 228.9741.

To a solution of fluoronitrobenzene (1.0 g, 4.5 mmol, 1.0 eq) in DMSO (7 mL) was added diethylamine (0.494 g, 0.7 mL, 6.75 mmol). The reaction mixture was stirred at room temperature for 24 h. After that time, 20 mL of water was added and the aqueous layer was extracted with dichloromethane (3 x 30 mL). The combined organic layers were dried over  $\text{MgSO}_4$ , filtered and concentrated under reduced pressure to give a pure bromonitroarene.

### 5-Bromo-*N,N*-diethyl-2-nitroaniline and 4-bromo-*N,N*-diethyl-2-nitroaniline

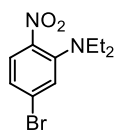

**5-Bromo-*N,N*-diethyl-2-nitroaniline.** Yield: 1.17 g (95%). Yellow oil.  $^1\text{H}$  NMR (500 MHz,  $\text{CDCl}_3$ , 25 °C)  $\delta$  7.56 (d, 1H,  $J = 8.5$  Hz), 7.24 (d, 1H,  $J = 2.0$  Hz), 7.00 (dd, 1H,  $J_1 = 8.5$  Hz,  $J_2 = 2.0$  Hz), 3.17 (q, 4H,  $J = 7.5$  Hz), 1.12 (t, 6H,  $J = 7.0$  Hz).  $^{13}\text{C}$  NMR (126 MHz,  $\text{CDCl}_3$ , 25 °C)  $\delta$  145.6, 141.4, 127.4, 127.4, 124.7, 122.6, 46.4, 12.6. HRMS (APCI) calcd for  $\text{C}_{10}\text{H}_{14}\text{N}_2\text{O}_2\text{Br}$  273.0239 [ $\text{M}+\text{H}^+$ ], found 273.0235.

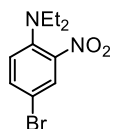

**4-Bromo-*N,N*-diethyl-2-nitroaniline.** Yield: 1.18 g (96%). Yellow oil.  $^1\text{H}$  NMR (500

<sup>4</sup> M. Wasińska, A. Korczewska, M. Giurg, J. Skarzewski, *Synthetic Communications* **2015**, 45, 143-150.

<sup>5</sup> J.-H. Chun, C. L. Morse, F. T. Chin, V. W. Pike, *Chem. Commun.* **2013**, 49, 2151-2153.

MHz, CDCl<sub>3</sub>, 25 °C)  $\delta$  7.80 (d, 1H,  $J$  = 7.5 Hz), 7.48 (dd, 1H,  $J_1$  = 8.5 Hz,  $J_2$  = 2.0 Hz), 7.02 (d, 1H,  $J$  = 9.0 Hz), 3.14 (q, 4H,  $J$  = 7.0 Hz), 1.09 (t, 6H,  $J$  = 7.5 Hz). <sup>13</sup>C NMR (126 MHz, CDCl<sub>3</sub>, 25 °C)  $\delta$  143.8, 143.6, 135.5, 128.4, 123.9, 111.7, 46.7, 12.6. HRMS (APCI) calcd for C<sub>10</sub>H<sub>14</sub>N<sub>2</sub>O<sub>2</sub>Br 273.0239 [M+H<sup>+</sup>], found 273.0241.

#### 4-bromo-4'-nitro-1,1'-biphenyl

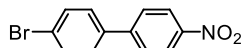

According to the literature procedure,<sup>6</sup> 4-bromophenylboronic acid (1.29 g, 6.47 mmol), 4-iodo-1-nitrobenzene (1.00 g, 4.97 mmol), Pd(PPh<sub>3</sub>)<sub>4</sub> (290 mg, 0.25 mmol) were added to 12 mL of anhydrous THF solution in round bottom flask under an argon atmosphere. Then, 6 mL of 2M solution of K<sub>2</sub>CO<sub>3</sub> in water was added to the reaction mixture. The mixture was heated at 80 °C for 24 h under an argon atmosphere. After that time, 20 mL of water was added and the aqueous layer was extracted with dichloromethane (3 x 80 mL). The combined organic layers were dried over MgSO<sub>4</sub>, filtered and concentrated under reduced pressure. The residue was purified using column chromatography (SiO<sub>2</sub>, hexanes : ethyl acetate = 100 : 2) to give the desired biphenyl.

Yield: 433 mg (31%). <sup>1</sup>H NMR (500 MHz, CDCl<sub>3</sub>, 25 °C)  $\delta$  8.30 (m, 2H), 7.71 (m, 2H), 7.63 (m, 2H), 7.49 (m). <sup>13</sup>C NMR (126 MHz, CDCl<sub>3</sub>, 25 °C)  $\delta$  147.4, 146.5, 137.8, 132.5, 129.1, 127.8, 124.4, 123.6. HRMS (EI) calcd for C<sub>12</sub>H<sub>8</sub>NO<sub>2</sub>Br 276.9738 [M<sup>+</sup>], found 276.9745.

<sup>6</sup> S. Kang, H. Jung, H. Lee, S. Lee, M. Jung, J. Lee, Y. C. Kim, J. Park, *Dyes Pigm.* **2018**, 156, 369-378.

**General procedure for a double direct arylation reaction and analytical data for all new compounds.**

In a 25 mL Schlenk flask containing a magnetic stirring bar were placed: **1** (0.1 mmol, 43.3 mg, 1.0 eq), tris(dibenzylideneacetone)dipalladium(0) (9.2 mg, 0.01 mmol, 10 %<sub>mol</sub>), PCy<sub>3</sub>·HBF<sub>4</sub> (7.4 mg, 0.02 mmol, 20 %<sub>mol</sub>), pivalic acid (6.2 mg, 0.06 mmol, 60 %<sub>mol</sub>), K<sub>2</sub>CO<sub>3</sub> (55.5 mg, 0.4 mmol, 4.0 eq) and the haloarene (0.3 mmol, 3.0 eq). The vessel was evacuated and backfilled with argon (3 times). Next, anhydrous, degassed toluene (2 mL) was added using a syringe. The vessel was tightly closed and again carefully evacuated and backfilled with argon (3 times). The content of the flask was stirred at 120 °C. After indicated time, all solvents were evaporated off and the residue was purified by column chromatography. All further manipulations are described below.

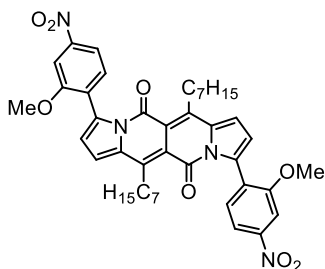

**6,12-Diheptyl-3,9-bis(2-methoxy-4-nitrophenyl)-5H,11H-dipyrrolo[1,2-*b*:1',2'-*g*][2,6]naphthyridine-5,11-dione (4).** Prepared using 1-bromo-2-methoxy-4-nitrobenzene (69.6 mg, 0.3 mmol). Time of heating: 72 h. Product was purified using column chromatography (SiO<sub>2</sub>, hexanes : dichloromethane, 2:3). The residue after column was boiled in

cyclohexane, then the flask was cooled down to room temperature and finally the crystals were filtered off to give 41.0 mg (56% yield) of product. *R*<sub>f</sub> = 0.36 (SiO<sub>2</sub>, hexanes : dichloromethane, 2:3). Mp. 205 - 206 °C. <sup>1</sup>H NMR (600 MHz, CDCl<sub>3</sub>, 25 °C) δ 7.93 (dd, 2H, *J*<sub>1</sub> = 8.4 Hz, *J*<sub>2</sub> = 1.8 Hz), 7.78 (d, 2H, *J* = 2.4 Hz), 7.48 (d, 2H, *J* = 8.4 Hz), 6.89 (d, 2H, *J* = 3.6 Hz), 6.53 (d, 2H, *J* = 4.2 Hz), 3.87 (s, 6H), 3.14-3.12 (m, 4H), 1.67-1.62 (m, 4H), 1.46-1.43 (m, 4H + residual cyclohexane), 1.34-1.26 (m, 12H), 0.86 (t, 6H, *J* = 7.2 Hz). <sup>13</sup>C NMR (151 MHz, CDCl<sub>3</sub>, 25 °C) δ 159.3, 157.8, 148.8, 143.7, 135.5, 133.7, 130.2, 129.8, 118.6, 116.3, 116.0, 115.4, 105.5, 56.1, 32.0, 30.6, 30.5, 30.4, 29.2, 27.1 (residual cyclohexane), 22.9, 14.2. HRMS (EI) calcd for C<sub>42</sub>H<sub>46</sub>N<sub>4</sub>O<sub>8</sub> 734.3316 [*M*<sup>+</sup>], found 734.3320.

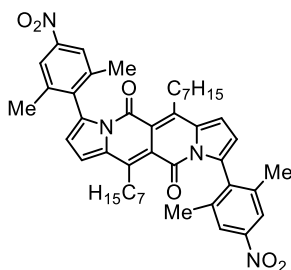

**3,9-Bis(2,6-dimethyl-4-nitrophenyl)-6,12-diheptyl-5H,11H-dipyrrolo[1,2-*b*:1',2'-*g*][2,6]naphthyridine-5,11-dione (5).** Prepared

using 2-bromo-1,3-dimethyl-5-nitrobenzene (69.0 mg, 0.3 mmol). The reaction mixture was heated at 150 °C in a sealed tube for 72h. Product was purified using column chromatography (SiO<sub>2</sub>, hexanes : dichloromethane, 1:1). Then, the obtained material was chromatographed again (SiO<sub>2</sub>, hexanes : ethyl acetate, 100:5 → neat ethyl acetate) in order to get rid of traces of the mono-arylated derivative. The residue after column was reprecipitated from dichloromethane/methanol mixture to give 48.5 mg (66% yield) of product. *R*<sub>f</sub> = 0.43 (SiO<sub>2</sub>, hexanes : dichloromethane, 1:1). Mp. 256 - 257 °C. <sup>1</sup>H NMR (500 MHz, CDCl<sub>3</sub>, 25 °C) δ 7.98 (s, 4H), 6.94 (d, 2H, *J* = 3.5 Hz), 6.33 (d, 2H, *J* = 4.0 Hz), 3.15-3.12 (m, 4H), 2.18 (s, 12H), 1.61-1.55 (m, 4H), 1.43-1.37 (m, 4H), 1.31-1.23 (m, 12H), 0.86 (t, 6H, *J* = 7.0 Hz). <sup>13</sup>C NMR (126 MHz, CDCl<sub>3</sub>, 25 °C) δ 159.0, 147.4, 144.7, 141.1, 139.1, 134.8, 134.3, 121.9, 116.9, 115.9, 115.3, 31.8, 30.5, 30.1, 29.8, 29.1, 22.8, 20.8, 14.2. HRMS (EI) calcd for C<sub>44</sub>H<sub>50</sub>N<sub>4</sub>O<sub>6</sub> 730.3730 [*M*<sup>+</sup>], found 730.3702.

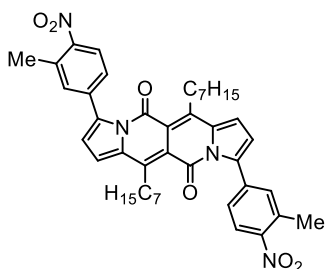

**6,12-Diheptyl-3,9-bis(3-methyl-4-nitrophenyl)-5*H*,11*H*-**

**dipyrrolo[1,2-*b*:1',2'-*g*][2,6]naphthyridine-5,11-dione (6).** Prepared using 4-bromo-2-methyl-1-nitrobenzene (64.8 mg, 0.3 mmol). Time of heating: 48 h. Product was purified using column chromatography (SiO<sub>2</sub>, hexanes : dichloromethane, 1:1). The residue after column was boiled in

a minimal amount of cyclohexane, then the flask was cooled down to room temperature and finally the crystals were filtered off to give 26.6 mg (38% yield) of product. *R*<sub>f</sub> = 0.46 (SiO<sub>2</sub>, hexanes : dichloromethane, 1:1). Mp. 273 - 274 °C. <sup>1</sup>H NMR (500 MHz, CDCl<sub>3</sub>, 25 °C) δ 8.05 (d, 2H, *J* = 8.0 Hz), 7.44-7.42 (m, 4H), 6.92 (d, 2H, *J* = 4.0 Hz), 6.61 (d, 2H, *J* = 3.5 Hz), 3.22-3.19 (m, 4H), 2.68 (s, 6H), 1.69-1.63 (m, 4H), 1.50-1.44 (m, 4H), 1.37-1.27 (m, 12H), 0.87 (t, 6H, *J* = 7.0 Hz). <sup>13</sup>C NMR (126 MHz, CDCl<sub>3</sub>, 25 °C) δ 159.6, 148.1, 144.4, 137.8, 137.7, 136.3, 133.5, 132.8, 127.3, 124.5, 119.7, 116.2, 32.0, 30.7, 30.6, 30.3, 29.3, 22.8, 21.1, 14.2. HRMS (EI) calcd for C<sub>42</sub>H<sub>46</sub>N<sub>4</sub>O<sub>6</sub> 702.3417 [*M*<sup>+</sup>], found 702.3404.

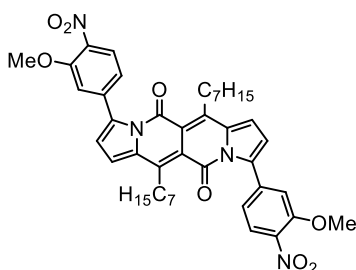

**6,12-Diheptyl-3,9-bis(3-methoxy-4-nitrophenyl)-5*H*,11*H*-**

**dipyrrolo[1,2-*b*:1',2'-*g*][2,6]naphthyridine-5,11-dione (7).** Prepared using 4-bromo-2-methoxy-1-nitrobenzene (69.6 mg, 0.3 mmol). Time

of heating: 48 h. Product was purified using column chromatography (SiO<sub>2</sub>, hexanes : dichloromethane, 1:2). The residue after column was boiled in a minimal amount of *n*-hexane, then the flask was cooled down to room temperature and finally the crystals were filtered off to give 19.5 mg (26% yield) of product. *R<sub>f</sub>* = 0.10 (SiO<sub>2</sub>, hexanes : dichloromethane, 1:2). Mp. 234 - 235 °C. <sup>1</sup>H NMR (500 MHz, CDCl<sub>3</sub>, 25 °C) δ 7.92 (d, 2H, *J* = 8.5 Hz), 7.19 (br s, 2H), 7.13 (dd, 2H, *J*<sub>1</sub> = 8.5 Hz, *J*<sub>2</sub> = 1.5 Hz), 6.93 (d, 2H, *J* = 4.0 Hz), 6.64 (d, 2H, *J* = 4.0 Hz), 4.00 (s, 6H), 3.21-3.17 (m, 4H), 1.69-1.63 (m, 4H), 1.51-1.45 (m, 4H), 1.36-1.25 (m, 12H), 0.87 (t, 6H, *J* = 6.5 Hz). <sup>13</sup>C NMR (126 MHz, CDCl<sub>3</sub>, 25 °C) δ 159.4, 152.7, 144.5, 139.1, 138.6, 137.8, 136.3, 125.5, 120.8, 119.8, 116.2, 114.2, 56.7, 31.9, 30.9, 30.6, 30.4, 29.3, 22.8, 14.2. HRMS (EI) calcd for C<sub>42</sub>H<sub>46</sub>N<sub>4</sub>O<sub>8</sub> 734.3316 [*M*<sup>+</sup>], found 734.3298.

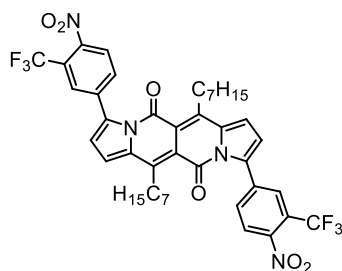

**6,12-Diheptyl-3,9-bis(4-nitro-3-(trifluoromethyl)phenyl)-5H,11H-dipyrrolo[1,2-*b*:1',2'-*g*][2,6]naphthyridine-5,11-dione (8).** Prepared using 4-bromo-1-nitro-2-(trifluoromethyl)benzene (81.0 mg, 0.3 mmol). Product was purified using column chromatography (SiO<sub>2</sub>, hexanes : dichloromethane, 1:1). The residue after column was boiled

in a minimal amount of cyclohexane and the flask was cooled down to room temperature. Then the crystals were filtered off and washed with *n*-pentane to give 22.9 mg (28% yield) of product. *R<sub>f</sub>* = 0.34 (SiO<sub>2</sub>, hexanes : dichloromethane, 1:1). Mp. 263 - 264 °C. <sup>1</sup>H NMR (500 MHz, CDCl<sub>3</sub>, 25 °C) δ 7.96 (d, 2H, *J* = 8.5 Hz), 7.92 (d, 2H, *J* = 1.0 Hz), 7.79 (dd, 2H, *J*<sub>1</sub> = 8.5 Hz, *J*<sub>2</sub> = 1.5 Hz), 6.97 (d, 2H, *J* = 4.0 Hz), 6.69 (d, 2H, *J* = 4.0 Hz), 3.21-3.18 (m, 4H), 1.68-1.62 (m, 4H), 1.51-1.49 (m, 4H), 1.37-1.26 (m, 12H), 0.87 (t, 6H, *J* = 6.5 Hz). <sup>13</sup>C NMR (126 MHz, CDCl<sub>3</sub>, 25 °C) δ 159.4, 146.8, 145.1, 137.7, 136.6, 136.1, 132.5, 128.6, 128.5, 124.9, 123.4 (q, *J*(C,F) = 34.0 Hz), 122.1 (q, *J*(C,F) = 274.4 Hz), 120.4, 116.5, 116.1, 31.9, 30.9, 30.5, 30.3, 29.2, 22.8, 14.2. HRMS (EI) calcd for C<sub>42</sub>H<sub>40</sub>N<sub>4</sub>O<sub>6</sub>F<sub>6</sub> 810.2852 [*M*<sup>+</sup>], found 810.2850.

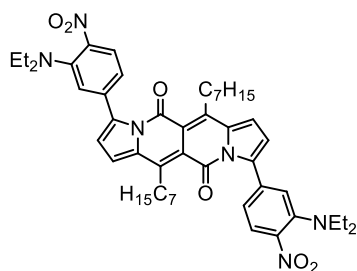

**3,9-Bis(3-(diethylamino)-4-nitrophenyl)-6,12-diheptyl-5H,11H-dipyrrolo[1,2-*b*:1',2'-*g*][2,6]naphthyridine-5,11-dione (9).** Prepared using 5-bromo-*N,N*-diethyl-2-nitroaniline (81.9 mg, 0.3 mmol). Product was purified using column chromatography (SiO<sub>2</sub>, hexanes : dichloromethane, 1:1 → 2:3). The residue after column was

recrystallized from acetonitrile, then the flask was left overnight in the fridge and finally the crystals were filtered off to give 36.5 mg (45% yield) of product. *R<sub>f</sub>* = 0.14 (SiO<sub>2</sub>, hexanes :

dichloromethane, 1:1). Mp. 194 - 195 °C.  $^1\text{H}$  NMR (500 MHz,  $\text{CDCl}_3$ , 25 °C)  $\delta$  7.74 (d, 2H,  $J$  = 8.0 Hz), 7.26-7.25 (m, 2H + residue signal of  $\text{CDCl}_3$ ), 7.06 (d, 2H,  $J$  = 8.0 Hz), 6.90 (d, 2H,  $J$  = 4.0 Hz), 6.60 (d, 2H,  $J$  = 3.5 Hz), 3.21-3.15 (m, 12H), 1.69-1.63 (m, 4H), 1.49-1.43 (m, 4H), 1.36-1.26 (m, 12H), 1.15 (t, 12H,  $J$  = 7.0 Hz), 0.87 (t, 6H,  $J$  = 6.5 Hz).  $^{13}\text{C}$  NMR (126 MHz,  $\text{CDCl}_3$ , 25 °C)  $\delta$  159.5, 144.2, 143.0, 138.4, 137.3, 136.1, 125.4, 123.5, 120.8, 119.4, 116.1, 116.0, 46.9, 32.0, 30.8, 30.6, 30.4, 29.3, 22.8, 14.3, 12.8. HRMS (EI) calcd for  $\text{C}_{48}\text{H}_{60}\text{N}_6\text{O}_6$  816.4574 [ $\text{M}^+$ ], found 816.4551.

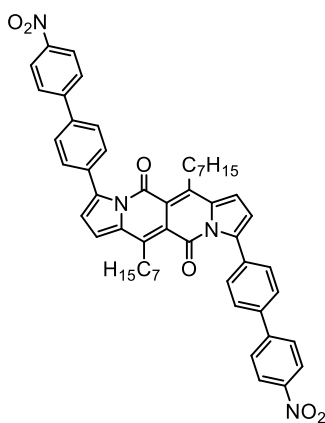

**6,12-Diheptyl-3,9-bis(4'-nitro-[1,1'-biphenyl]-4-yl)-5H,11H-**

**dipyrrolo[1,2-*b*:1',2'-*g*][2,6]naphthyridine-5,11-dione (10).** Prepared using 4-bromo-4'-nitro-1,1'-biphenyl (83.4 mg, 0.3 mmol). Time of heating: 24 h. Product was purified using column chromatography ( $\text{SiO}_2$ , hexanes : dichloromethane, 1:1). The residue after chromatography was reprecipitated from dichloromethane/methanol mixture to give 38.6 mg (47% yield) of product.  $R_f$  = 0.23 ( $\text{SiO}_2$ , hexanes : dichloromethane, 1:1). Mp. 295 - 296 °C.  $^1\text{H}$  NMR (500 MHz,  $\text{CDCl}_3$ , 25 °C)  $\delta$  8.33 (d,

4H,  $J$  = 9.0 Hz), 7.81 (d, 4H,  $J$  = 9.0 Hz), 7.68 (d, 4H,  $J$  = 8.5 Hz), 7.63 (d, 4H,  $J$  = 8.5 Hz), 6.92 (d, 2H,  $J$  = 4.0 Hz), 6.61 (d, 2H,  $J$  = 3.5 Hz), 3.26-3.23 (m, 4H), 1.73-1.67 (m, 4H), 1.52-1.46 (m, 4H), 1.39-1.25 (m, 12H), 0.86 (t, 6H,  $J$  = 7.0 Hz).  $^{13}\text{C}$  NMR (126 MHz,  $\text{CDCl}_3$ , 25 °C)  $\delta$  159.9, 147.3, 143.8, 139.3, 138.1, 135.9, 133.7, 129.5, 127.8, 126.8, 124.3, 118.9, 116.1, 116.0, 32.0, 30.7, 30.6, 30.4, 29.3, 22.9, 14.3. HRMS (EI) calcd for  $\text{C}_{52}\text{H}_{50}\text{N}_4\text{O}_6$  826.3730 [ $\text{M}^+$ ], found 826.3693.

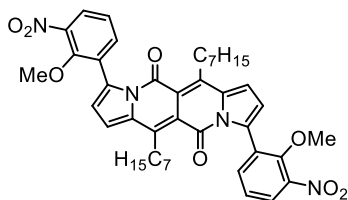

**6,12-Diheptyl-3,9-bis(2-methyl-5-nitrophenyl)-5H,11H-**

**dipyrrolo[1,2-*b*:1',2'-*g*][2,6]naphthyridine-5,11-dione (13).** Prepared using 1-bromo-2-methoxy-3-nitrobenzene (69.6 mg, 0.3 mmol). Time of heating: 7 days. Product was purified using column chromatography

( $\text{SiO}_2$ , hexanes : dichloromethane, 2:3). The residue after column was washed with a minimal amount of *n*-pentane and then the crystals were filtered off to give 15.8 mg (21% yield) of product.  $R_f$  = 0.28 ( $\text{SiO}_2$ , hexanes : dichloromethane, 2:3). Mp. 169 - 170 °C.  $^1\text{H}$  NMR (500 MHz,  $\text{CDCl}_3$ , 25 °C)  $\delta$  7.83 (dd, 2H,  $J_1$  = 8.0 Hz,  $J_2$  = 1.5 Hz), 7.56 (dd, 2H,  $J_1$  = 7.5 Hz,  $J_2$  = 1.5 Hz), 7.24 (m, 2H + residue signal from  $\text{CDCl}_3$ ), 6.89 (d, 2H,  $J$  = 3.5 Hz), 6.58 (d, 2H,  $J$  = 4.0 Hz), 3.60 (s, 6H), 3.16-3.13 (m, 4H), 1.66-1.60 (m, 4H), 1.45-1.39 (m, 4H), 1.33-1.25 (m, 12H), 0.87 (t, 6H,  $J$  = 7.0 Hz).  $^{13}\text{C}$  NMR (126 MHz,  $\text{CDCl}_3$ , 25 °C)  $\delta$  159.4, 151.6, 144.1, 144.1, 135.3, 134.4, 132.8, 130.5, 125.0,

123.3, 118.5, 116.1, 115.4, 62.0, 31.9, 30.6, 30.5, 30.3, 29.2, 22.8, 14.3. HRMS (ESI) calcd for  $C_{42}H_{46}N_4O_8Na$  757.3213  $[M+Na^+]$ , found 757.3229.

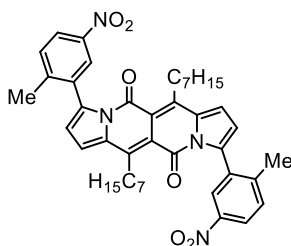

**6,12-Diheptyl-3,9-bis(2-methyl-5-nitrophenyl)-5H,11H-dipyrrolo[1,2-*b*:1',2'-*g*][2,6]naphthyridine-5,11-dione (14).** Prepared using 2-bromo-1-methyl-4-nitrobenzene (64.8 mg, 0.3 mmol). Time of heating: 48 h. Product was purified using column chromatography ( $SiO_2$ , hexanes : dichloromethane, 1:1). The residue after column was boiled in

acetonitrile/cyclohexane = 1:1 (v/v), then the flask was cooled down to room temperature and finally the crystals were filtered off to give 31.0 mg (44% yield) of product.  $R_f$  = 0.28 ( $SiO_2$ , hexanes : dichloromethane, 1:1). Mp. 238 - 240 °C.  $^1H$  NMR (500 MHz,  $CDCl_3$ , 25 °C)  $\delta$  8.19-8.15 (m, 4H), 7.41 (d, 2H,  $J$  = 8.5 Hz), 6.91 (d, 2H,  $J$  = 3.5 Hz), 6.46 (d, 2H,  $J$  = 3.5 Hz), 3.14 (br s, 4H), 2.29 (s, 6H), 1.63-1.54 (m, 4H+ residual cyclohexane), 1.44-1.38 (m, 4H), 1.33-1.26 (m, 12H), 0.87 (t, 6H,  $J$  = 7.0 Hz).  $^{13}C$  NMR (126 MHz,  $CDCl_3$ , 25 °C)  $\delta$  159.2, 146.0, 145.6, 144.8, 136.1, 135.4, 134.7, 130.4, 124.5, 123.3, 118.3, 115.7, 31.9, 30.6, 30.6, 30.2, 29.1, 22.8, 20.6, 14.2. HRMS (EI) calcd for  $C_{42}H_{46}N_4O_6$  702.3417  $[M^+]$ , found 702.3416.

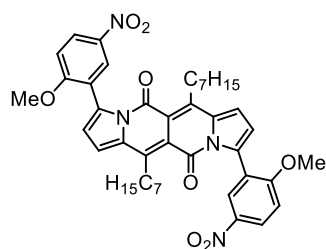

**6,12-Diheptylo-3,9-bis(2-metoksy-5-nitrofenylo)-5H,11H-dipirolo[1,2-*b*:1',2'-*g*][2,6]naftyrydyno-5,11-dion (15).** Prepared using 2-bromo-1-methoxy-4-nitrobenzene (69.6 mg, 0.3 mmol). Time of heating: 48 h. Product was purified using column chromatography ( $SiO_2$ , hexanes : dichloromethane, 2:5). The residue after column was

recrystallized from toluene, the crystals were carefully filtered off and washed with *n*-pentane to give 40.7 mg (55% yield) of product.  $R_f$  = 0.46 ( $SiO_2$ , hexanes : dichloromethane, 1:2). Mp. 270 - 271 °C.  $^1H$  NMR (500 MHz,  $CDCl_3$ , 50 °C)  $\delta$  8.32 (dd, 2H,  $J_1$  = 9.0 Hz,  $J_2$  = 3.0 Hz), 8.24 (d, 2H,  $J$  = 2.5 Hz), 6.98 (d, 2H,  $J$  = 9.0 Hz), 6.88 (d, 2H,  $J$  = 3.5 Hz), 6.53 (d, 2H,  $J$  = 4.0 Hz), 3.88 (s, 6H), 3.16-3.13 (m, 4H), 1.69-1.63 (m, 4H), 1.47-1.42 (m, 4H+residual water in  $CDCl_3$ ), 1.36-1.26 (m, 12H), 0.88 (t, 6H,  $J$  = 7.0 Hz).  $^{13}C$  NMR (126 MHz,  $CDCl_3$ , 50 °C)  $\delta$  162.7, 159.3, 143.9, 141.4, 135.3, 133.5, 126.0, 125.6, 124.6, 118.4, 116.3, 115.3, 110.1, 56.4, 32.0, 30.6, 30.5, 30.4, 29.2, 22.8, 14.2. HRMS (ESI) calcd for  $C_{42}H_{46}N_4O_8Na$  757.3213  $[M+Na^+]$ , found 730.3209.

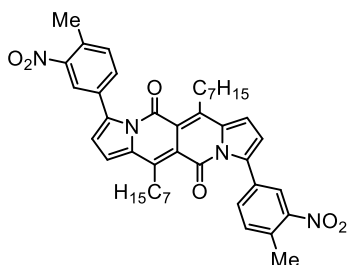

**6,12-Diheptyl-3,9-bis(4-methyl-3-nitrophenyl)-5H,11H-dipyrrolo[1,2-*b*:1',2'-*g*][2,6]naphthyridine-5,11-dione (16).** Prepared

using 4-bromo-1-methyl-2-nitrobenzene (64.8 mg, 0.3 mmol). Time of heating: 48 h. Product was purified using column chromatography (SiO<sub>2</sub>, hexanes : dichloromethane, 1:1) to give 33.2 mg (47% yield) of product.  $R_f$  = 0.37 (SiO<sub>2</sub>, hexanes : dichloromethane, 1:1). Mp. 195 - 196 °C. <sup>1</sup>H NMR (500 MHz, CDCl<sub>3</sub>, 25 °C)  $\delta$  8.13 (d, 2H,  $J$  = 1.5 Hz), 7.61 (dd, 2H,  $J_1$  = 8.0 Hz,  $J_2$  = 1.5 Hz), 7.36 (d, 2H,  $J$  = 8.0 Hz), 6.91 (d, 2H,  $J$  = 4.0 Hz), 6.59 (d, 2H,  $J$  = 4.0 Hz), 3.21-3.18 (m, 4H), 2.68 (s, 6H), 1.69-1.63 (m, 4H), 1.49-1.43 (m, 4H), 1.37-1.27 (m, 12H), 0.87 (t, 6H,  $J$  = 6.5 Hz). <sup>13</sup>C NMR (126 MHz, CDCl<sub>3</sub>, 25 °C)  $\delta$  159.7, 148.6, 144.3, 137.4, 135.8, 133.3, 133.2, 132.1, 125.0, 119.0, 116.0, 115.9, 32.0, 30.7, 30.6, 30.3, 29.2, 22.8, 20.7, 14.3. HRMS (EI) calcd for C<sub>42</sub>H<sub>46</sub>N<sub>4</sub>O<sub>6</sub> 702.3417 [M<sup>+</sup>], found 702.3424.

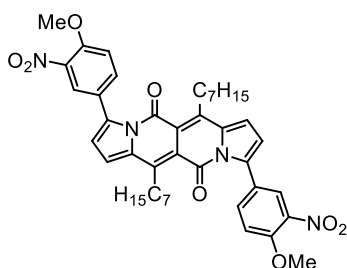

**6,12-Diheptyl-3,9-bis(4-methoxy-3-nitrophenyl)-5H,11H-**

**dipyrrolo[1,2-*b*:1',2'-*g*][2,6]naphthyridine-5,11-dione (17).** Prepared using 4-bromo-1-methoxy-2-nitrobenzene (69.6 mg, 0.3 mmol). Time of heating: 48 h. Product was purified using column chromatography (SiO<sub>2</sub>, hexanes : dichloromethane, 1:2) to give 35.0 mg (48% yield) of

product.  $R_f$  = 0.12 (SiO<sub>2</sub>, hexanes : dichloromethane, 1:2). Mp. 208 - 209 °C. <sup>1</sup>H NMR (500 MHz, CDCl<sub>3</sub>, 25 °C)  $\delta$  8.01 (d, 2H,  $J$  = 2.5 Hz), 7.66 (dd, 2H,  $J_1$  = 9.0 Hz,  $J_2$  = 2.5 Hz), 7.10 (d, 2H,  $J$  = 8.5 Hz), 6.88 (d, 2H,  $J$  = 4.0 Hz), 6.53 (d, 2H,  $J$  = 4.0 Hz), 4.03 (s, 6H), 3.20-3.17 (m, 4H), 1.68-1.62 (m, 4H), 1.50-1.44 (m, 4H), 1.37-1.28 (m, 12H), 0.88 (t, 6H,  $J$  = 6.5 Hz). <sup>13</sup>C NMR (126 MHz, CDCl<sub>3</sub>, 25 °C)  $\delta$  159.7, 152.8, 144.2, 138.8, 137.3, 135.6, 134.6, 126.3, 125.7, 118.6, 115.9, 115.7, 112.7, 56.8, 32.0, 30.7, 30.6, 30.3, 29.2, 22.8, 14.3. HRMS (EI) calcd for C<sub>42</sub>H<sub>46</sub>N<sub>4</sub>O<sub>8</sub> 734.3316 [M<sup>+</sup>], found 734.3314.

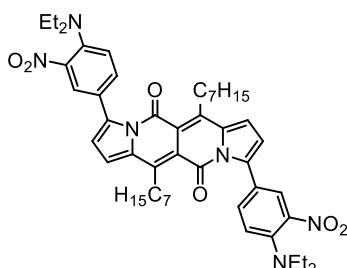

**3,9-Bis(4-(diethylamino)-3-nitrophenyl)-6,12-diheptyl-5H,11H-**

**dipyrrolo[1,2-*b*:1',2'-*g*][2,6]naphthyridine-5,11-dione (18).** Prepared using 4-bromo-N,N-diethyl-2-nitroaniline (81.9 mg, 0.3 mmol). Product was purified using column chromatography (SiO<sub>2</sub>, hexanes : dichloromethane, 1:1). The residue after column was recrystallized

from acetonitrile, then the flask was left overnight in the fridge and finally the crystals were filtered off to give 49.3 mg (60% yield) of product.  $R_f$  = 0.17 (SiO<sub>2</sub>, hexanes : dichloromethane, 1:1). Mp. 179 - 180 °C. <sup>1</sup>H NMR (500 MHz, CDCl<sub>3</sub>, 25 °C)  $\delta$  7.86 (d, 2H,  $J$  = 2.5 Hz), 7.52 (dd, 2H,  $J_1$  = 8.5 Hz,  $J_2$  = 2.0 Hz), 7.11 (d, 2H,  $J$  = 8.5 Hz), 6.89 (d, 2H,  $J$  = 4.0 Hz), 6.53 (d, 2H,  $J$  = 4.0 Hz), 3.28-3.19 (m, 12H), 1.71-1.64 (m, 4H), 1.51-1.45 (m, 4H), 1.39-1.29 (m, 12H), 1.19 (t, 12H,  $J$  = 7.0 Hz),

0.88 (t, 6H,  $J = 6.5$  Hz).  $^{13}\text{C}$  NMR (126 MHz,  $\text{CDCl}_3$ , 25 °C)  $\delta$  159.9, 144.2, 143.8, 141.2, 138.1, 135.6, 133.2, 126.5, 124.0, 120.3, 118.3, 116.0, 115.7, 46.3, 32.0, 30.7, 30.7, 30.4, 29.2, 22.8, 14.3, 12.8. HRMS (EI) calcd for  $\text{C}_{48}\text{H}_{60}\text{N}_6\text{O}_6$  816.4574 [ $\text{M}^+$ ], found 816.4598.

## 2. Spectroscopic measurements

**Table S1.** Absorption and fluorescence properties of DPNDs **1-18**.

| cmpd                 | solvent <sup>a</sup> | $\lambda_{\text{abs}}/\text{nm}^b$ | $\lambda_{\text{fl}}/\text{nm}^b$ | Stokes' shift/ $\text{cm}^{-1c}$ | $\Phi_{\text{fl}}$ | $\tau/\text{ns}^d$ | $k_{\text{r}} \cdot 10^{-8}/\text{s}^{-1e}$ | $k_{\text{nr}} \cdot 10^{-8}/\text{s}^{-1e}$ |
|----------------------|----------------------|------------------------------------|-----------------------------------|----------------------------------|--------------------|--------------------|---------------------------------------------|----------------------------------------------|
| <b>1<sup>f</sup></b> | DCB                  | 508                                | 528                               | 750                              | 0.81               | 5.1                | 1.59                                        | 0.373                                        |
|                      | DCM                  | 504                                | 523                               | 720                              | 0.73               | 5.7                | 1.28                                        | 0.474                                        |
|                      | ACN                  | 498                                | 525                               | 1030                             | 0.65               | 5.7                | 1.14                                        | 0.614                                        |
| <b>2<sup>f</sup></b> | DCB                  | 569                                | 605                               | 1050                             | 0.45               | 3.6                | 1.25                                        | 1.53                                         |
|                      | DCM                  | 562                                | 601                               | 1150                             | 0.41               | 3.4                | 1.21                                        | 1.74                                         |
|                      | ACN                  | 559                                | 599                               | 1190                             | 0.07               | —                  | —                                           | —                                            |
| <b>3<sup>f</sup></b> | DCB                  | 536                                | 580                               | 1410                             | 0.61               | 4.3                | 1.42                                        | 0.91                                         |
|                      | DCM                  | 533                                | 578                               | 1460                             | 0.49               | 3.3                | 1.48                                        | 1.55                                         |
|                      | ACN                  | 529                                | 579                               | 1630                             | 0.013              | 0.049              | 2.65                                        | 201                                          |
| <b>4</b>             | DCB                  | 547                                | 612                               | 1940                             | 0.46               | 3.7                | 1.24                                        | 1.46                                         |
|                      | DCM                  | 543                                | 610                               | 2040                             | 0.21               | 1.7                | 1.24                                        | 4.65                                         |
|                      | ACN                  | 542                                | 604                               | 1910                             | 0.005              | —                  | —                                           | —                                            |
| <b>5</b>             | DCB                  | 524                                | 560                               | 1230                             | 0.96               | 4.7                | 2.04                                        | 0.085                                        |
|                      | DCM                  | 521                                | 560                               | 1340                             | 0.34               | 1.9                | 1.79                                        | 3.47                                         |
|                      | ACN                  | 518                                | 564                               | 1570                             | 0.005              | —                  | —                                           | —                                            |
| <b>6</b>             | DCB                  | 557                                | 607                               | 1480                             | 0.58               | 3.7                | 1.57                                        | 1.14                                         |
|                      | DCM                  | 549                                | 605                               | 1690                             | 0.45               | 3.6                | 1.25                                        | 1.53                                         |
|                      | ACN                  | 545                                | 608                               | 1900                             | 0.24               | 2.8                | 0.857                                       | 2.71                                         |
| <b>7</b>             | DCB                  | 556                                | 606                               | 1480                             | 0.58               | 3.6                | 1.61                                        | 1.17                                         |
|                      | DCM                  | 549                                | 604                               | 1660                             | 0.44               | 3.5                | 1.26                                        | 1.60                                         |
|                      | ACN                  | 546                                | 603                               | 1890                             | 0.31               | 3.2                | 0.969                                       | 2.16                                         |
| <b>8</b>             | DCB                  | 558                                | 606                               | 1400                             | 0.45               | 3.6                | 1.25                                        | 1.53                                         |
|                      | DCM                  | 548                                | 602                               | 1640                             | 0.31               | 3.2                | 0.969                                       | 2.16                                         |
|                      | ACN                  | 543                                | 606                               | 1940                             | 0.005              | —                  | —                                           | —                                            |
| <b>9</b>             | DCB                  | 555                                | 602                               | 1390                             | 0.006              | —                  | —                                           | —                                            |
|                      | DCM                  | 549                                | 608                               | 1760                             | 0.003              | —                  | —                                           | —                                            |
|                      | ACN                  | 542                                | 584                               | 1330                             | 0.003              | —                  | —                                           | —                                            |
| <b>10</b>            | DCB                  | 563                                | 618                               | 1580                             | 0.38               | 3.4                | 1.12                                        | 1.82                                         |
|                      | DCM                  | 555                                | 615                               | 1760                             | 0.28               | 2.5                | 1.12                                        | 2.88                                         |
|                      | ACN                  | 550                                | 608                               | 1730                             | 0.05               | 3.0                | 0.17                                        | 3.17                                         |

|                       |     |     |     |      |       |       |       |       |
|-----------------------|-----|-----|-----|------|-------|-------|-------|-------|
| <b>11<sup>f</sup></b> | DCB | 551 | 582 | 970  | 0.49  | 3.6   | 1.36  | 1.42  |
|                       | DCM | 544 | 577 | 1050 | 0.28  | 2.2   | 1.27  | 3.27  |
|                       | ACN | 541 | 575 | 1090 | 0.04  | 0.309 | 1.29  | 31.1  |
| <b>12<sup>f</sup></b> | DCB | 527 | 558 | 1050 | 0.95  | 4.7   | 2.02  | 0.106 |
|                       | DCM | 523 | 555 | 1100 | 0.92  | 4.8   | 1.92  | 0.167 |
|                       | ACN | 521 | 553 | 1110 | 0.43  | 2.7   | 1.59  | 2.11  |
| <b>13</b>             | DCB | 532 | 583 | 1640 | 0.61  | 4.3   | 1.42  | 0.907 |
|                       | DCM | 525 | 584 | 1920 | 0.52  | 3.5   | 1.49  | 1.37  |
|                       | ACN | 524 | 582 | 1900 | 0.12  | 1.1   | 1.09  | 8.00  |
| <b>14</b>             | DCB | 525 | 568 | 1440 | 0.76  | 4.9   | 1.55  | 0.490 |
|                       | DCM | 522 | 566 | 1490 | 0.58  | 3.2   | 1.81  | 1.31  |
|                       | ACN | 520 | 569 | 1660 | 0.075 | —     | —     | —     |
| <b>15</b>             | DCB | 535 | 586 | 1630 | 0.63  | 4.3   | 1.47  | 0.860 |
|                       | DCM | 531 | 582 | 1650 | 0.59  | 3.6   | 1.64  | 1.14  |
|                       | ACN | 528 | 590 | 1990 | 0.20  | 1.8   | 1.11  | 4.44  |
| <b>16</b>             | DCB | 547 | 593 | 1420 | 0.69  | 3.8   | 1.82  | 0.816 |
|                       | DCM | 541 | 593 | 1620 | 0.46  | 3.6   | 1.28  | 1.50  |
|                       | ACN | 537 | 592 | 1730 | 0.17  | 2.0   | 0.850 | 4.15  |
| <b>17</b>             | DCB | 553 | 604 | 1530 | 0.64  | 4.0   | 1.60  | 0.900 |
|                       | DCM | 546 | 604 | 1760 | 0.43  | 3.7   | 1.16  | 1.54  |
|                       | ACN | 543 | 609 | 2000 | 0.18  | 2.5   | 0.720 | 3.28  |
| <b>18</b>             | DCB | 575 | 669 | 2440 | 0.12  | 2.6   | 0.462 | 3.38  |
|                       | DCM | 565 | 670 | 2770 | 0.02  | —     | —     | —     |
|                       | ACN | 557 | 688 | 3420 | 0.04  | 2.8   | 0.143 | 3.43  |

<sup>a</sup> DCB = 1,2-dichlorobenzene ( $\epsilon = 9.93$ ,  $n = 1.5514$ ,  $f_0(\epsilon, n^2) = 0.37$ ,  $\eta = 1.32$  cP)<sup>7</sup>; DCM = dichloromethane ( $\epsilon = 9.08$ ,  $n = 1.424$ ,  $f_0(\epsilon, n^2) = 0.44$ ,  $\eta = 0.45$  cP); ACN = acetonitrile ( $\epsilon = 37.5$ ,  $n = 1.3393$ ,  $f_0(\epsilon, n^2) = 0.61$ ,  $\eta = 0.37$  cP). <sup>b</sup> Absorption and fluorescence maxima. <sup>c</sup> Stokes' shifts. <sup>d</sup> Lifetimes of the emissive excited states obtained from time-correlated single photon counting (for  $\tau \gtrsim 1.5$  ns). <sup>e</sup> Radiative and non-radiative decay rate constants:  $k_r = \Phi_f \tau^{-1}$  and  $k_{nr} = (1 - \Phi_f)\tau^{-1}$ . <sup>f</sup> The data were taken from: B. Sadowski *et al.* *Chem. Sci.*, 2021, **12**, 14039-14049.

<sup>7</sup> a) M. Terazima, *J. Chem. Phys.* **1996**, *104*, 4988. b) A. I. Abramovich, L. V. Lanshina, I. D. Kargin, *Russ. Chem. Bull.* **2017**, *66*, 828–832. c) A. Rostamkolahi, A. Rostami, F. Koohyar, F. Kiani, *Chem. Pap.* **2013**, *67*, 1433-1441.

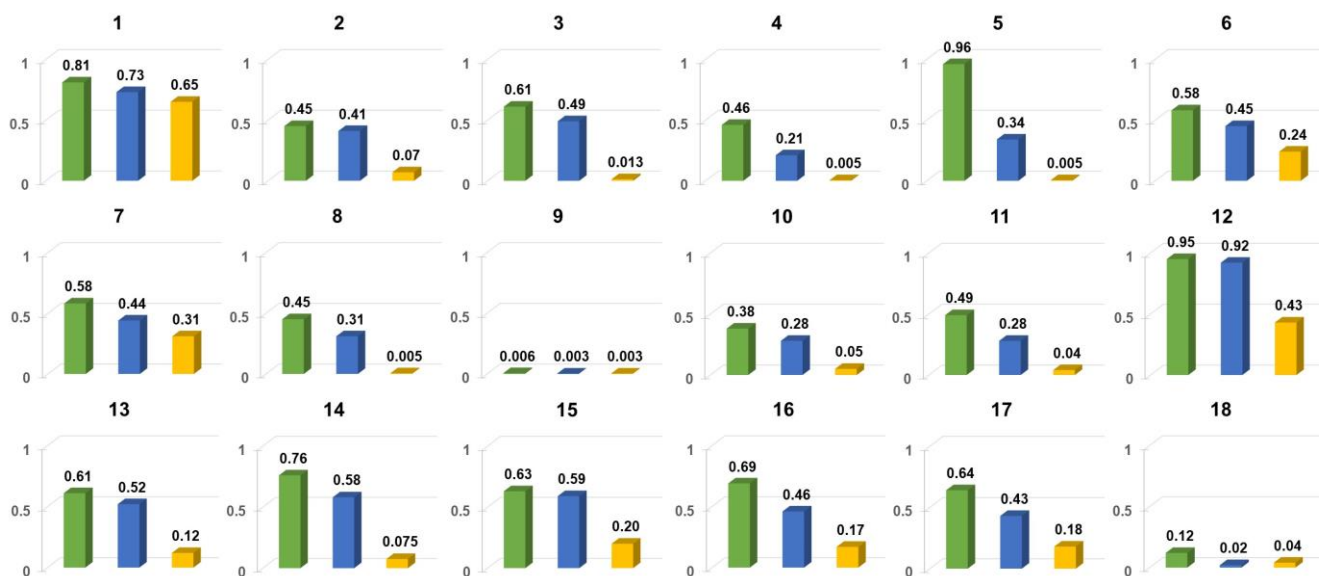

**Figure S1.** Comparison of  $\phi_f$  for compounds **1-18** in three different solvents: 1,2-dichlorobenzene (DCB) (green), DCM (blue) and ACN (orange). The data for compounds **1**, **2**, **3**, **11** and **12** were taken from the literature: B. Sadowski *et al.* *Chem. Sci.*, 2021,12, 14039-14049.

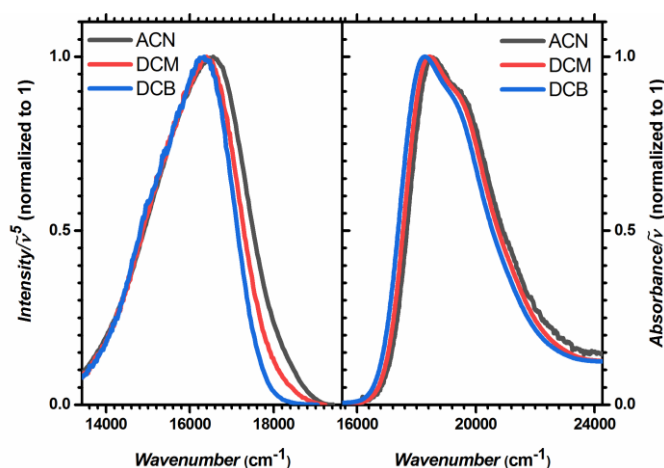

**Figure S2.** Absorption and emission spectra of **4** in DCB, DCM and ACN.

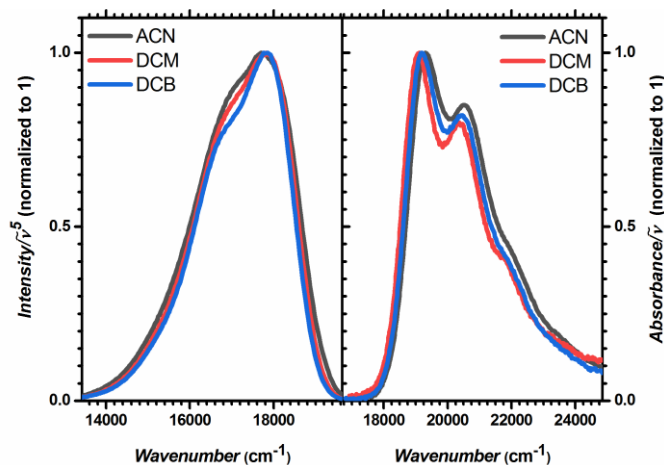

**Figure S3.** Absorption and emission spectra of **5** in DCB, DCM and ACN.

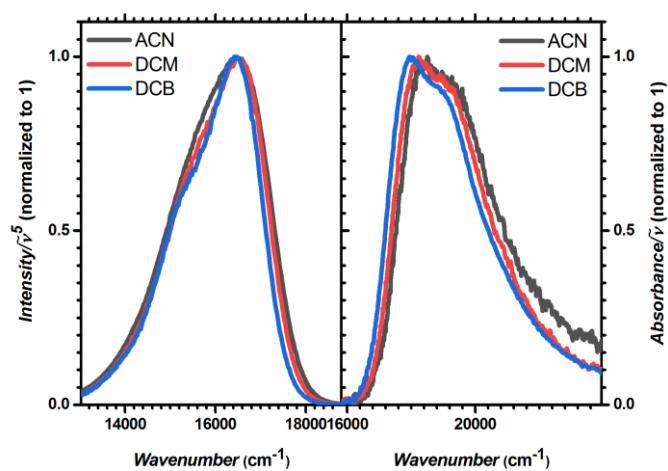

**Figure S4.** Absorption and emission spectra of **6** in DCB, DCM and ACN.

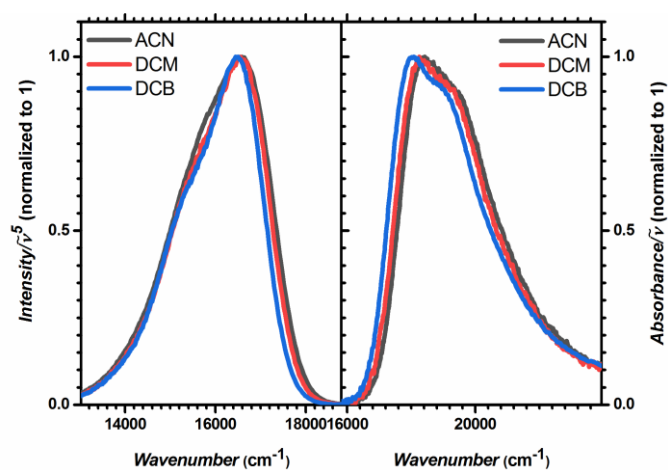

**Figure S5.** Absorption and emission spectra of **7** in DCB, DCM and ACN.

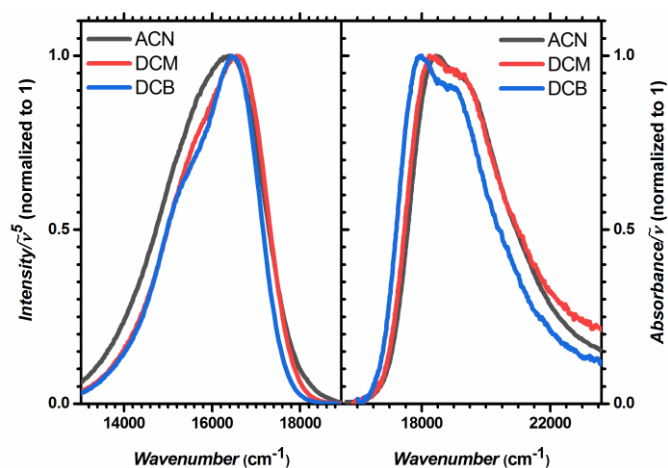

**Figure S6.** Absorption and emission spectra of **8** in DCB, DCM and ACN.

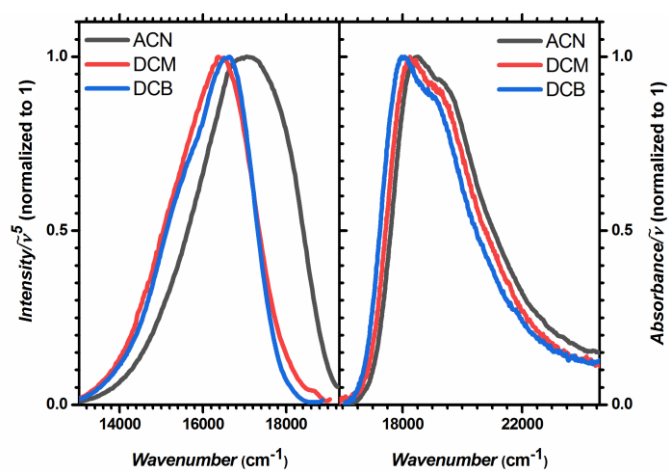

**Figure S7.** Absorption and emission spectra of **9** in DCB, DCM and ACN.

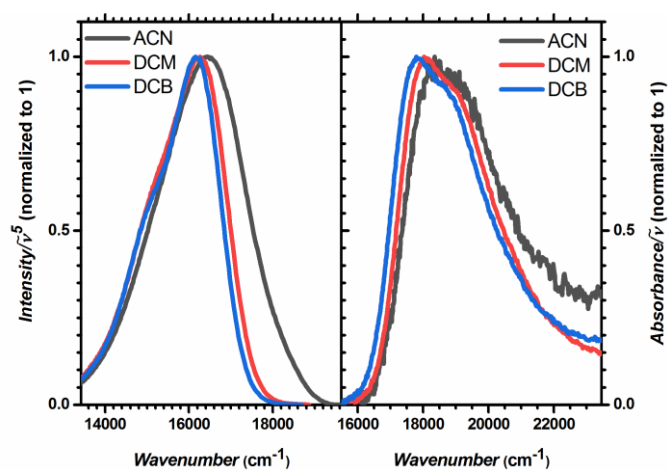

**Figure S8.** Absorption and emission spectra of **10** in DCB, DCM and ACN.

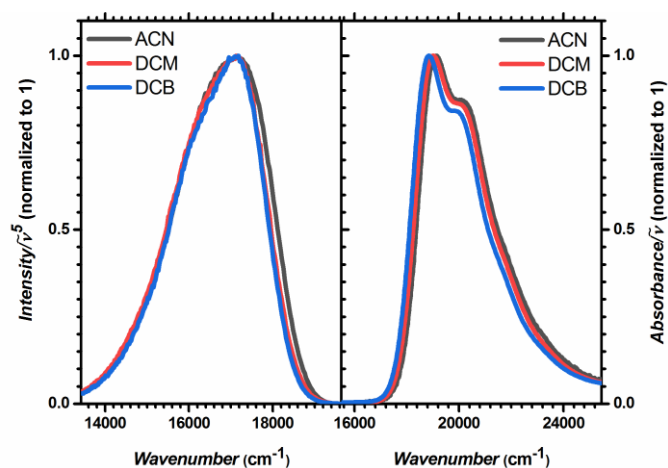

**Figure S9.** Absorption and emission spectra of **13** in DCB, DCM and ACN.

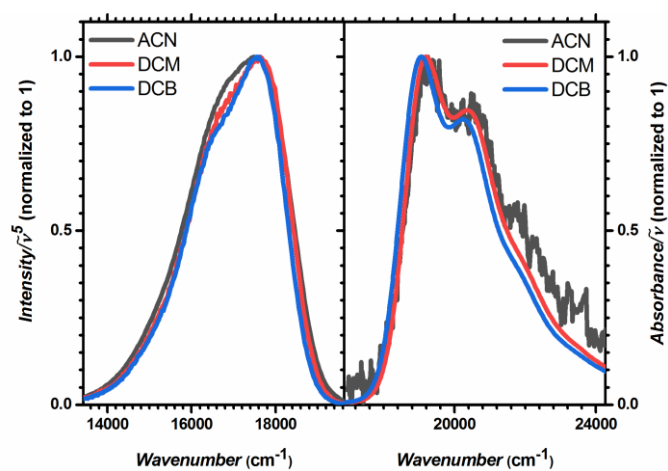

**Figure S10.** Absorption and emission spectra of **14** in DCB, DCM and ACN.

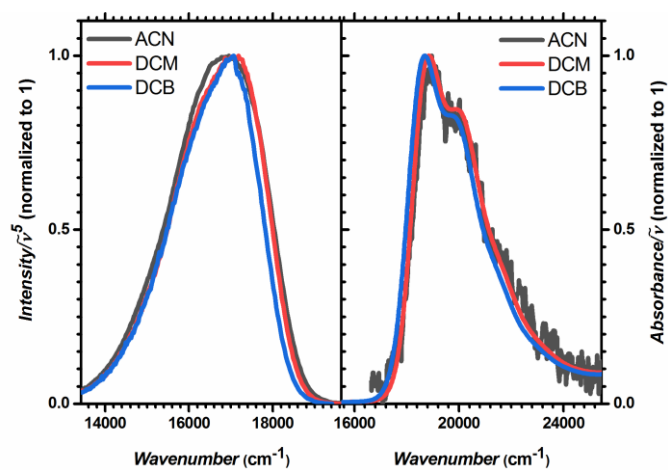

**Figure S11.** Absorption and emission spectra of **15** in DCB, DCM and ACN.

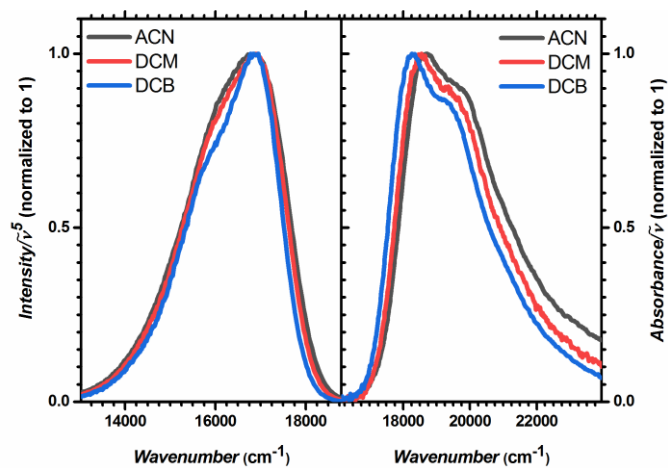

**Figure S12.** Absorption and emission spectra of **16** in DCB, DCM and ACN.

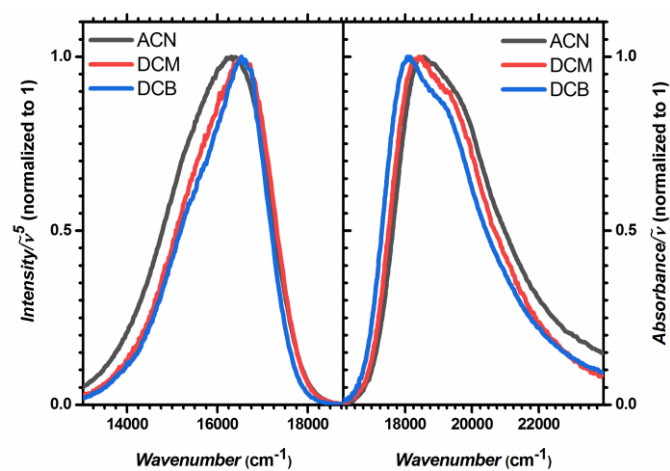

**Figure S13.** Absorption and emission spectra of **17** in DCB, DCM and ACN.

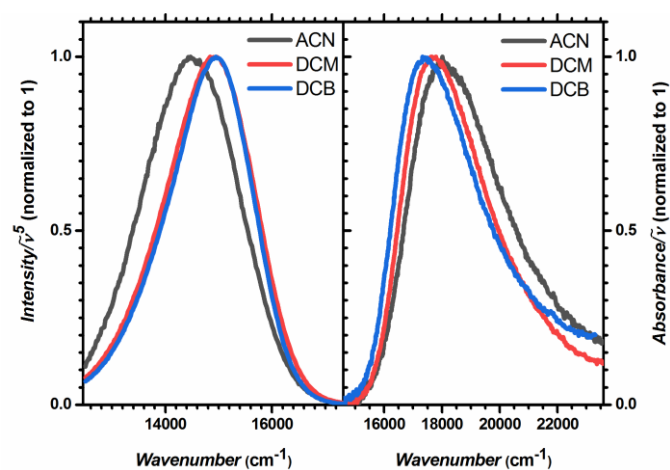

**Figure S14.** Absorption and emission spectra of **18** in DCB, DCM and ACN.

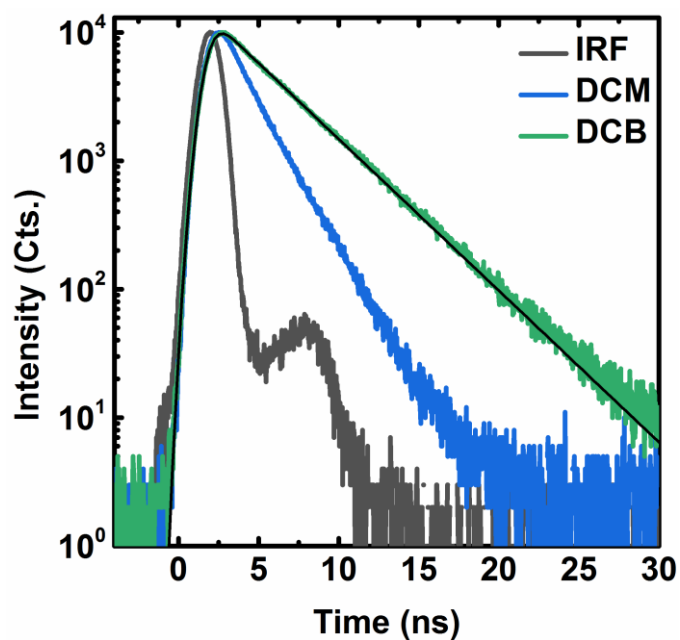

**Figure S15.** Emission decays of **4** in DCM and DCB. The decays were gated at the indicated wavelengths. The emission lifetimes of **4** in ACN are below IRF (grey curve, 1.5 ns), and thus the emission decays could not be recorded.

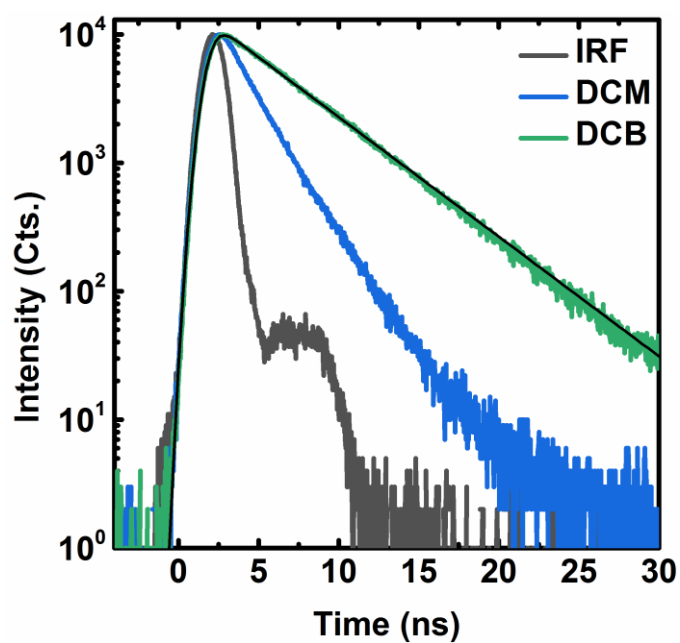

**Figure S16.** Emission decays of **5** in DCB and DCM. The emission lifetimes of **5** in ACN are below IRF (grey curve, 1.5 ns), and thus the emission decays could not be recorded.

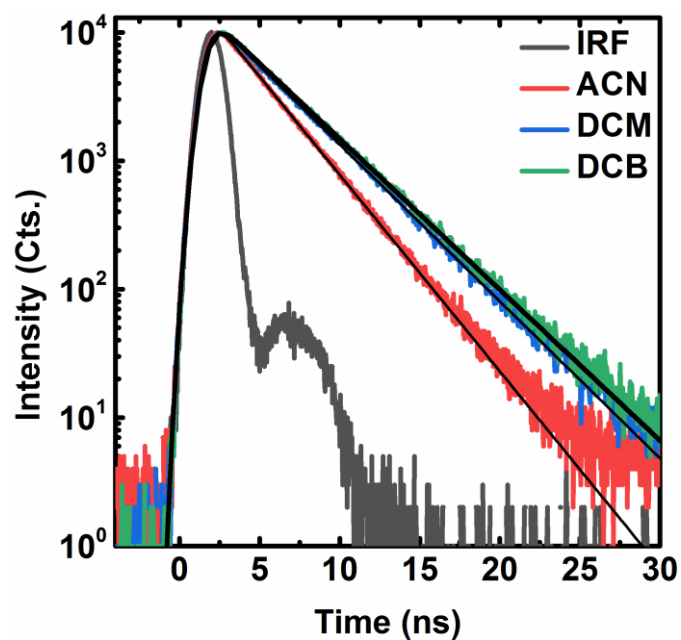

**Figure S17.** Emission decays of **6** in DCB, DCM and ACN.

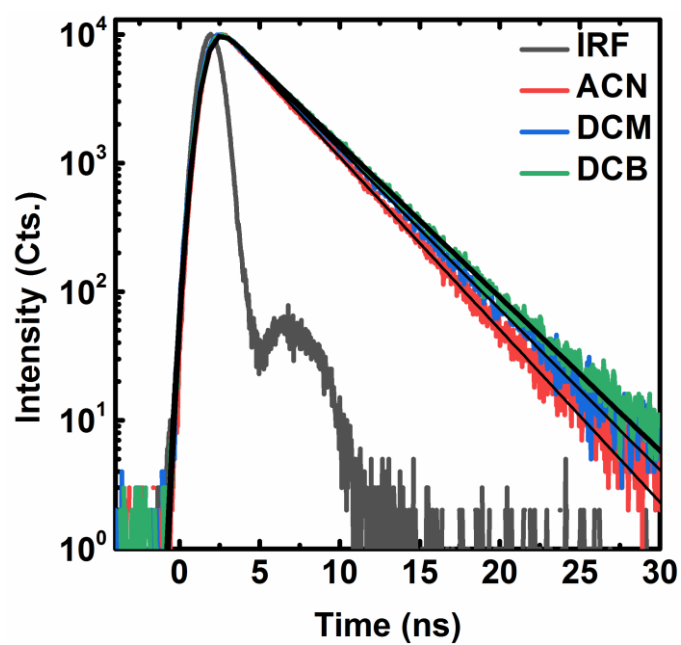

**Figure S18.** Emission decays of **7** in DCB, DCM and ACN.

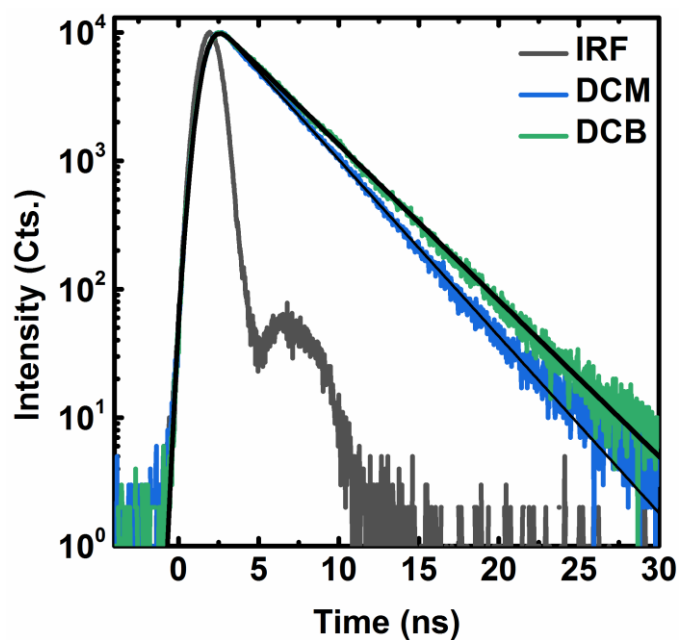

**Figure S19.** Emission decays of **8** in DCB and DCM. The emission lifetime of **8** in ACN is below IRF (grey curve, 1.5 ns), and thus the emission decays could not be recorded.

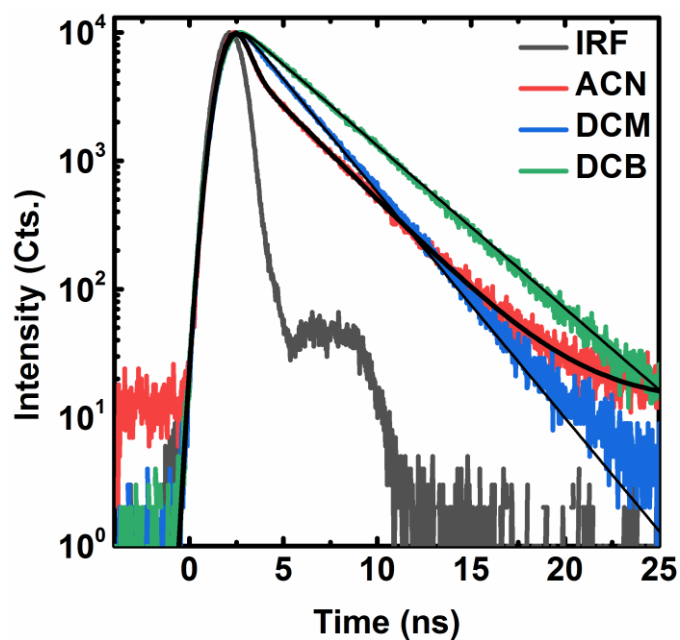

**Figure S20.** Emission decays of **10** in DCB, DCM and ACN.

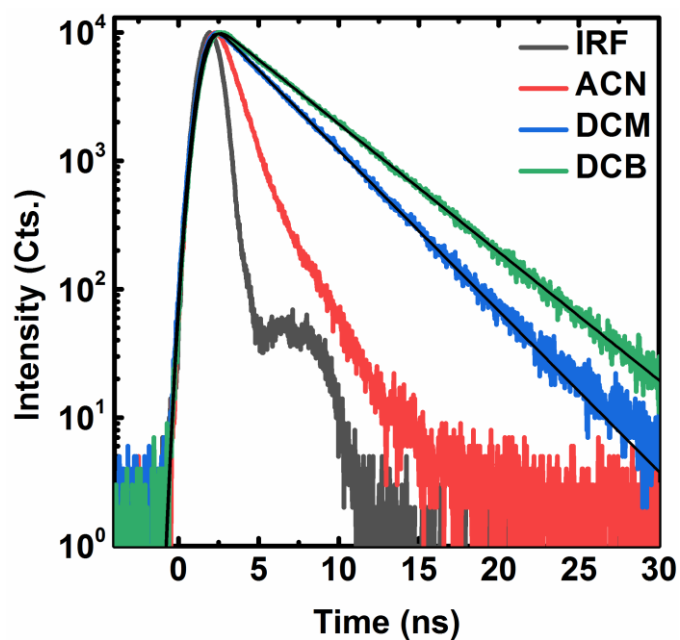

**Figure S21.** Emission decays of **13** in DCB, DCM and ACN.

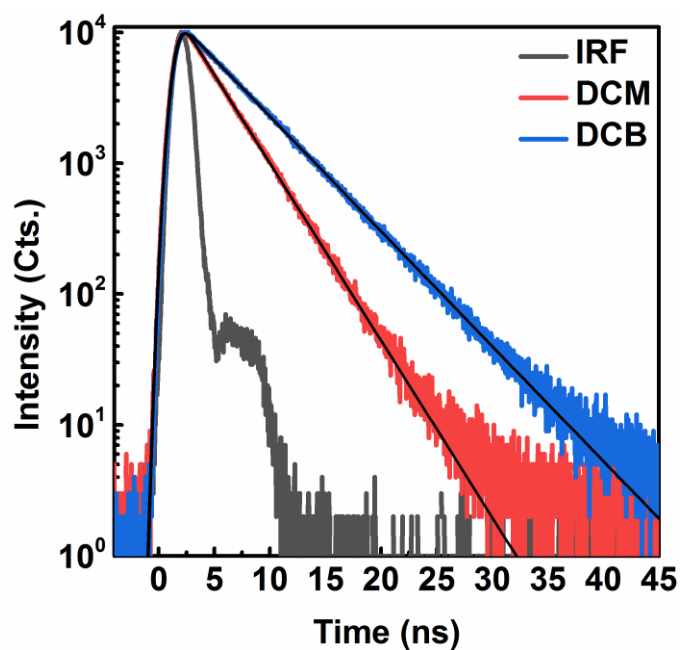

**Figure S22.** Emission decays of **14** in DCB and DCM. The emission lifetime of **14** in ACN is below IRF (grey curve, 1.5 ns), and thus the emission decay could not be recorded.

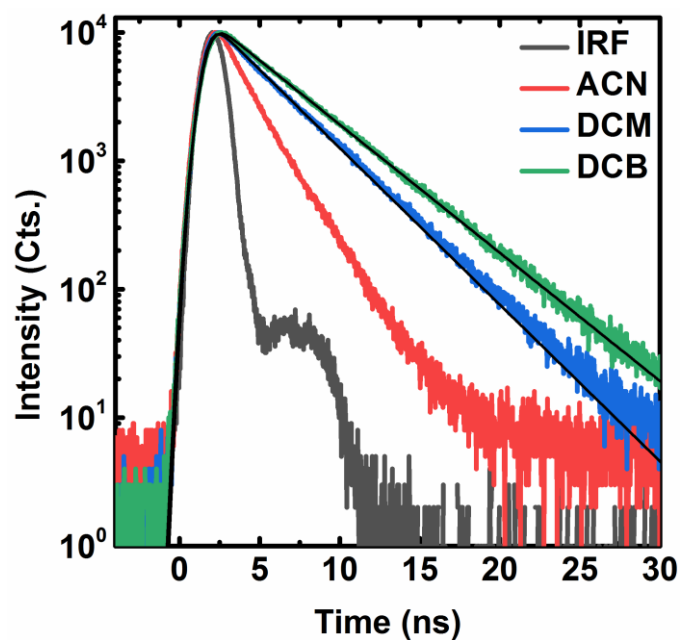

**Figure S23.** Emission decays of **15** in DCB, DCM and ACN.

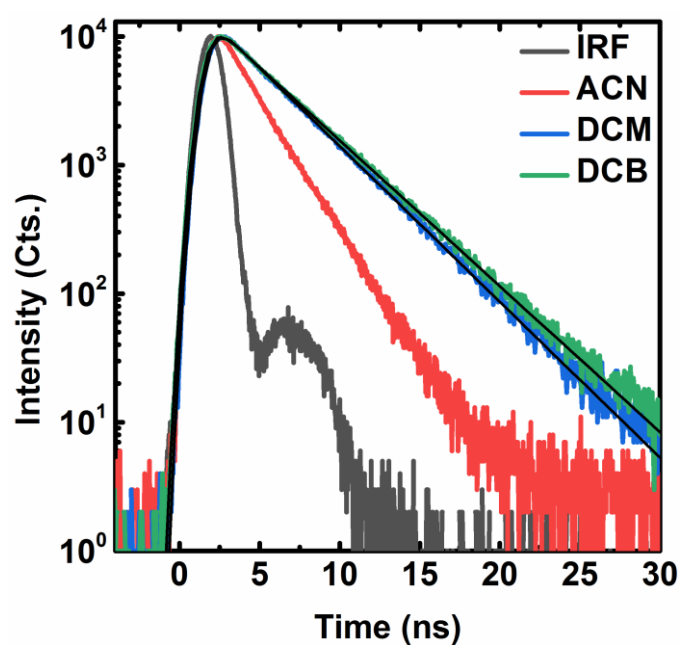

**Figure S24.** Emission decays of **16** DCB, DCM and ACN.

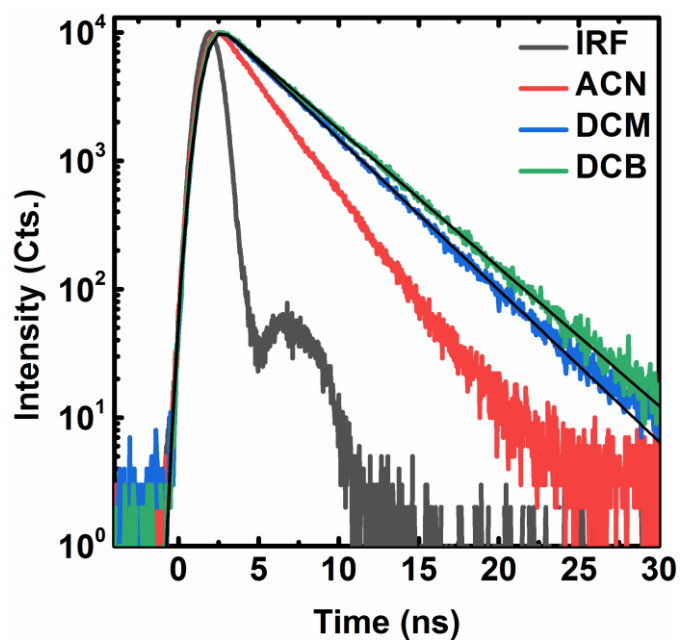

**Figure S25.** Emission decays of **17** in DCB, DCM and ACN.

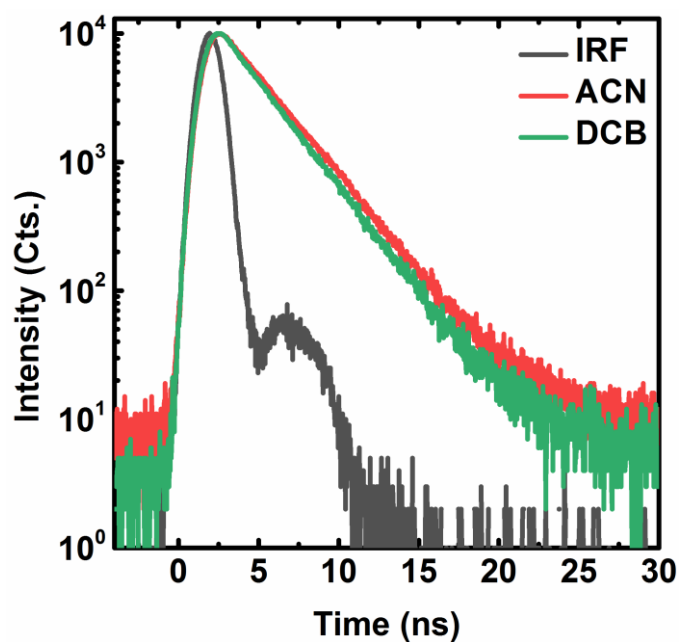

**Figure S26.** Emission decays of **18** in DCB and ACN. The emission lifetime of **18** in DCM is below IRF (grey curve, 1.5 ns), and thus the emission decays could not be recorded.

### 3. Two-photon absorption measurements

**Table S2.** Two-photon absorption data of compounds **1-18** in DCM.

| Compound  | $\lambda_{2PA}$ / nm | $\sigma_2$ / GM |
|-----------|----------------------|-----------------|
| <b>1</b>  | 830                  | 27              |
|           | 750                  | 44              |
| <b>2</b>  | <690                 | >3718           |
| <b>3</b>  | 820                  | 102             |
|           | 730                  | 209             |
|           | <680                 | 312             |
| <b>4</b>  | 840                  | 270             |
|           | <690                 | >835            |
| <b>5</b>  | 810                  | 86              |
|           | 765                  | 152             |
|           | 720                  | 157             |
|           | <680                 | >197            |
| <b>6</b>  | 730                  | 908             |
|           | <690                 | >1177           |
| <b>7</b>  | 810                  | 401             |
|           | <690                 | >1326           |
| <b>8</b>  | <690                 | >1134           |
| <b>9</b>  | 755                  | 4.3             |
|           | 720                  | 5.6             |
|           | <690                 | >9              |
| <b>10</b> | 720                  | 1384            |
| <b>11</b> | 770                  | 115             |
|           | 720                  | 186             |
|           | <680                 | >233            |
| <b>12</b> | 820                  | 47              |
|           | <685                 | >175            |
| <b>13</b> | 820                  | 43              |
|           | <685                 | >167            |
| <b>14</b> | 820                  | 25              |
|           | <685                 | >96             |
| <b>15</b> | 820                  | 46              |
|           | <685                 | $\geq 161$      |
| <b>16</b> | 940                  | 53              |
|           | 890                  | 84              |
|           | 790                  | 272             |
|           | 730                  | 310             |
|           | <680                 | >340            |
| <b>17</b> | 890                  | 89              |
|           | <700                 | $\geq 513$      |
| <b>18</b> | 940                  | 27              |
|           | 810                  | 86              |
|           | 755                  | 104             |

**Table S3.** Two-photon absorption spectra of compounds **1-18** in DCM.

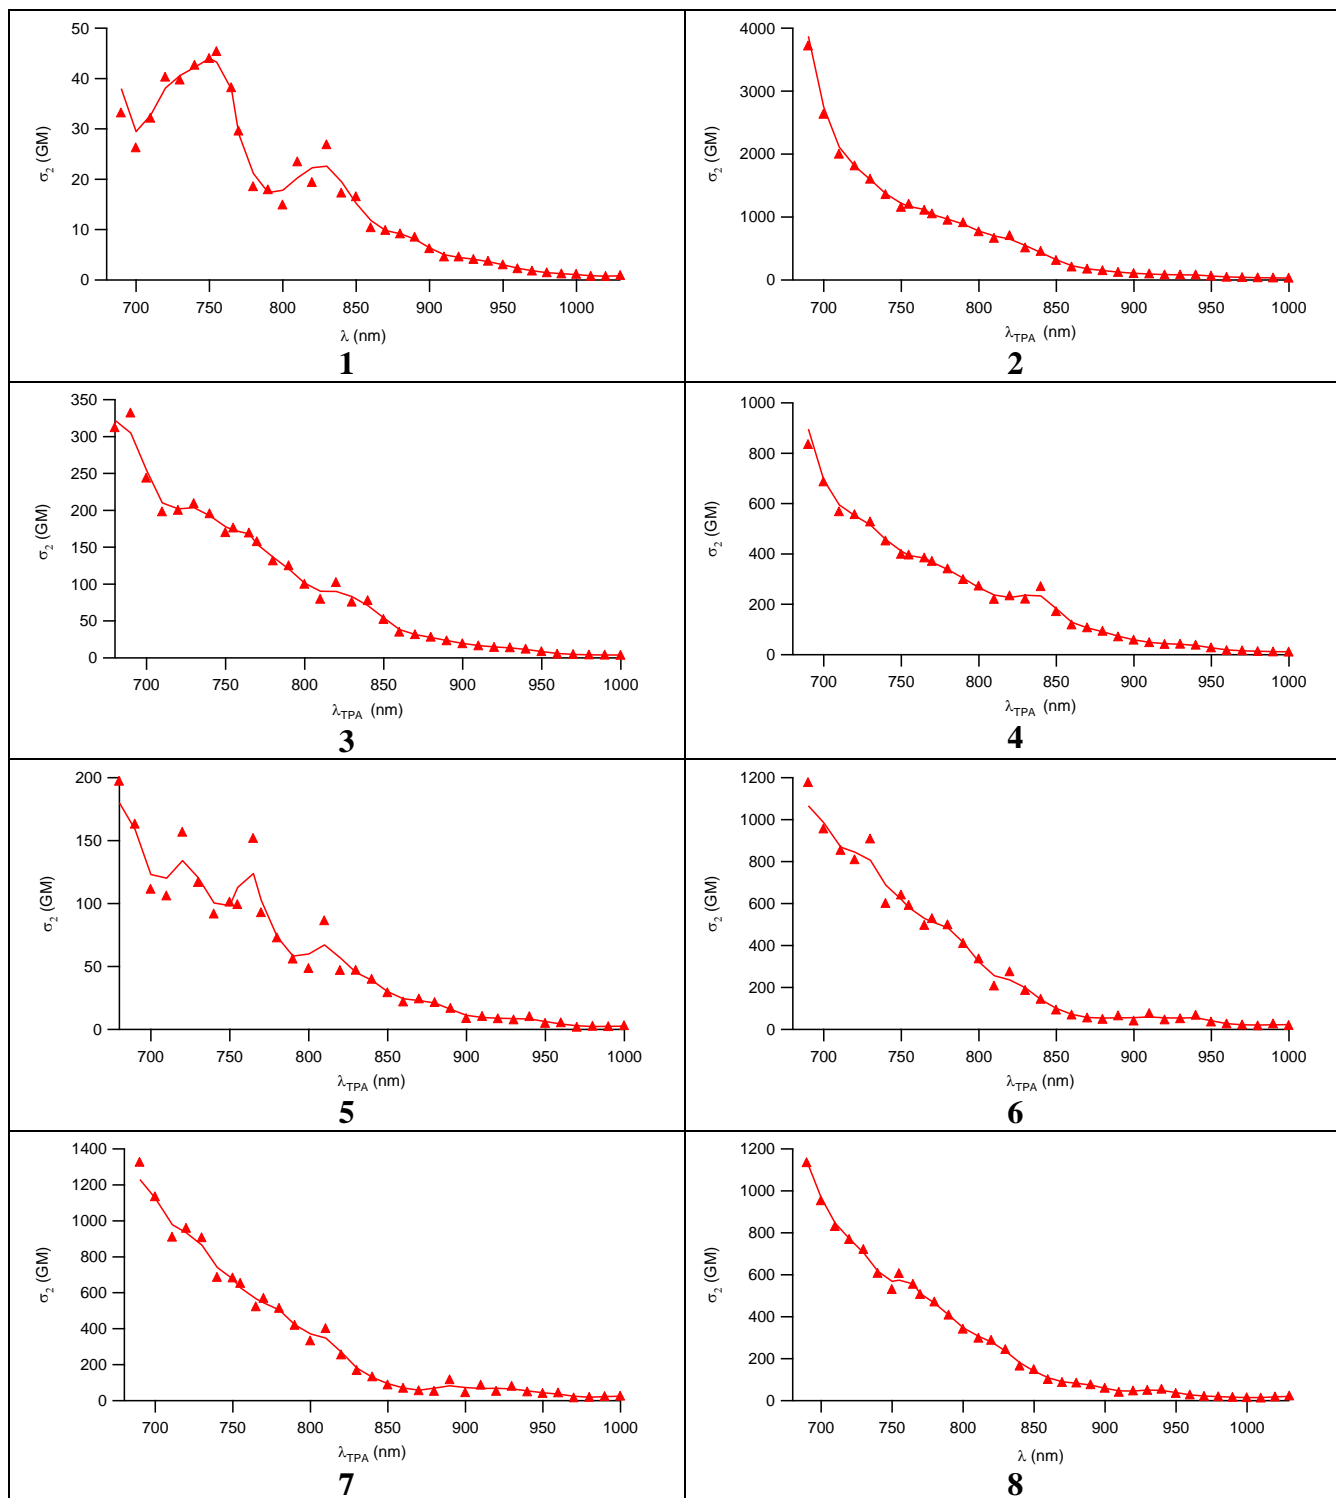

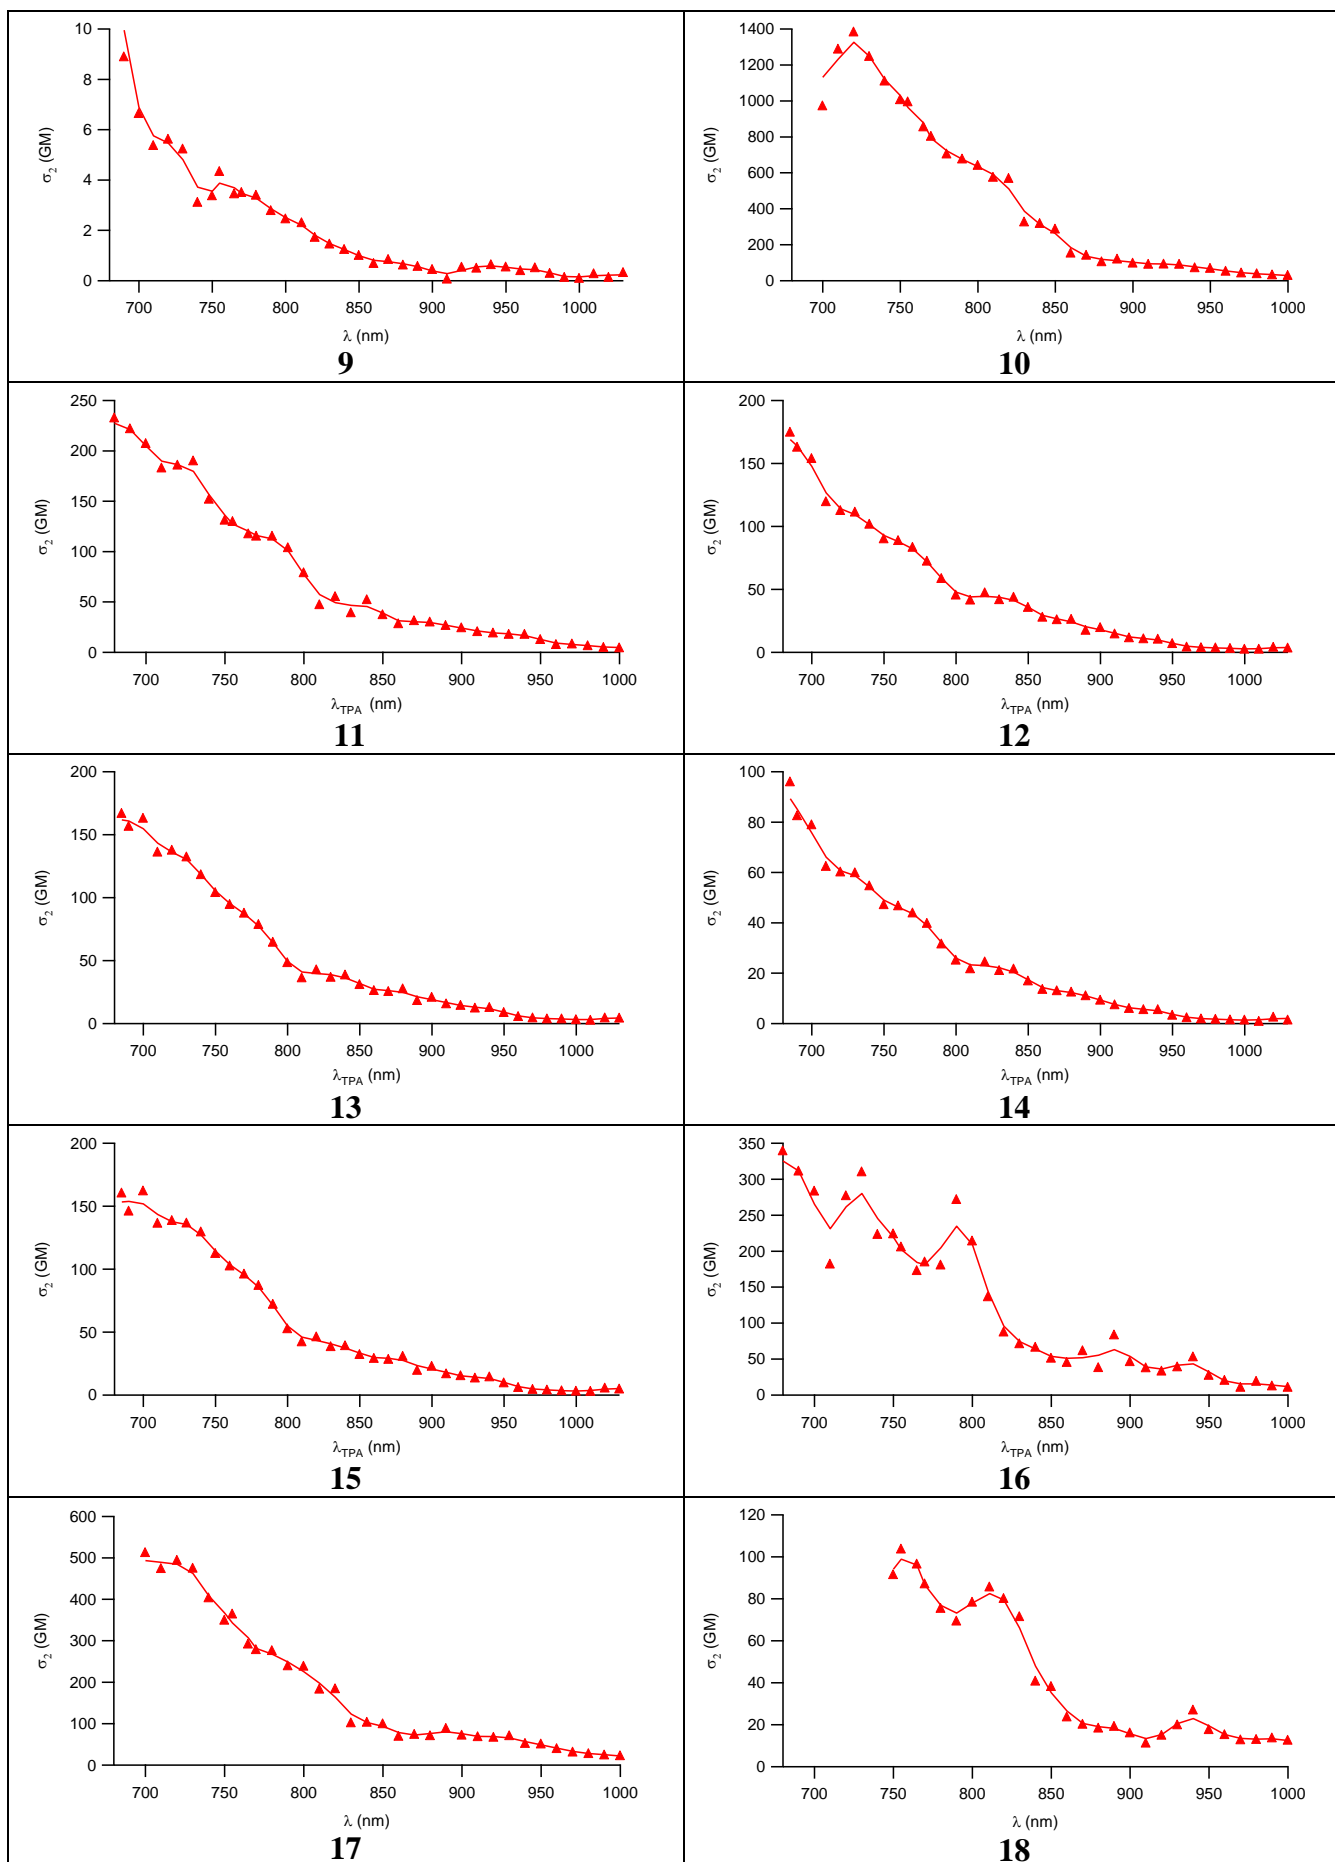

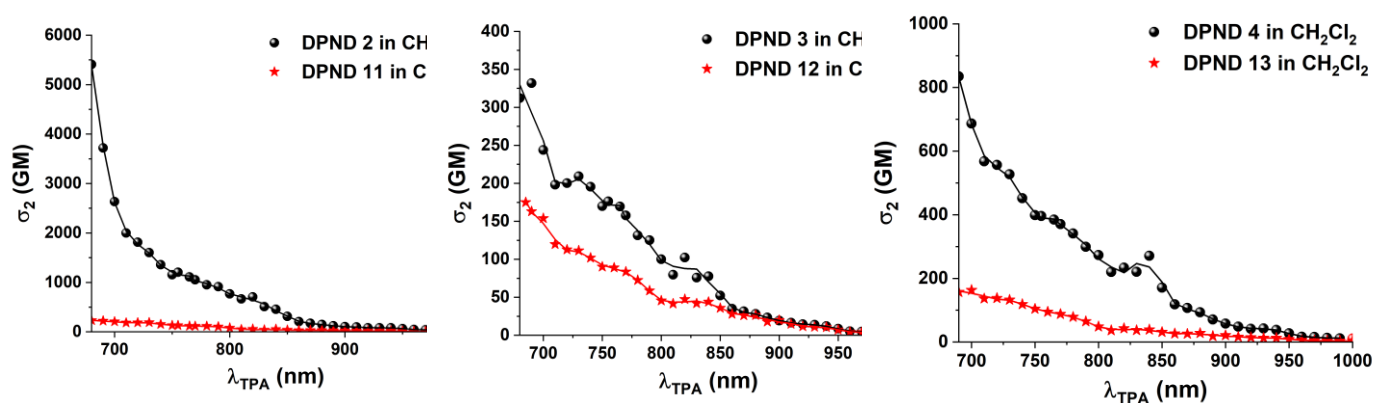

**Figure S27.** Effect of the position of the  $NO_2$  group (*ortho* vs. *para* derivatives) on 2PA.

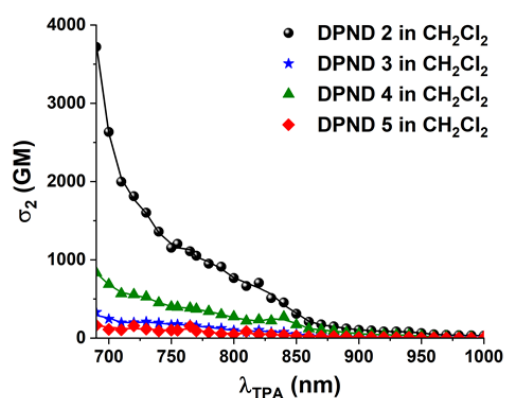

**Figure S28.** Influence of the presence of an additional substituent in *meta* position with respect to the *para*  $NO_2$  group on 2PA.

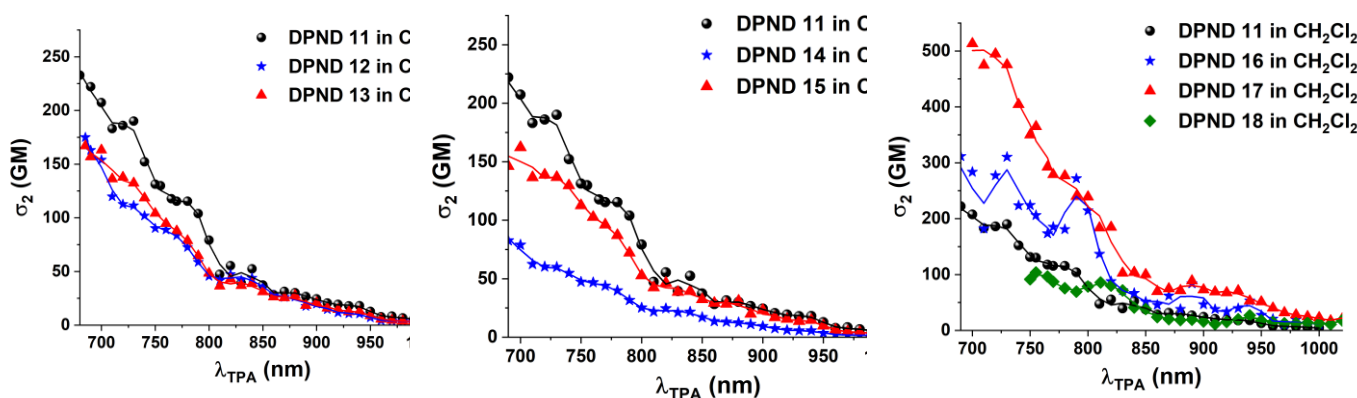

**Figure S29.** Influence of the presence of an additional substituent in *ortho*, *para* or *ortho'* position for *meta*  $NO_2$  derivatives on 2PA.

#### 4. $^1\text{H}$ and $^{13}\text{C}$ NMR spectra of new compounds.

**Note:** despite the fact that the samples were dried overnight under high vacuum at 70 °C there are traces of solvents that disturb an alkyl region of NMR spectra.

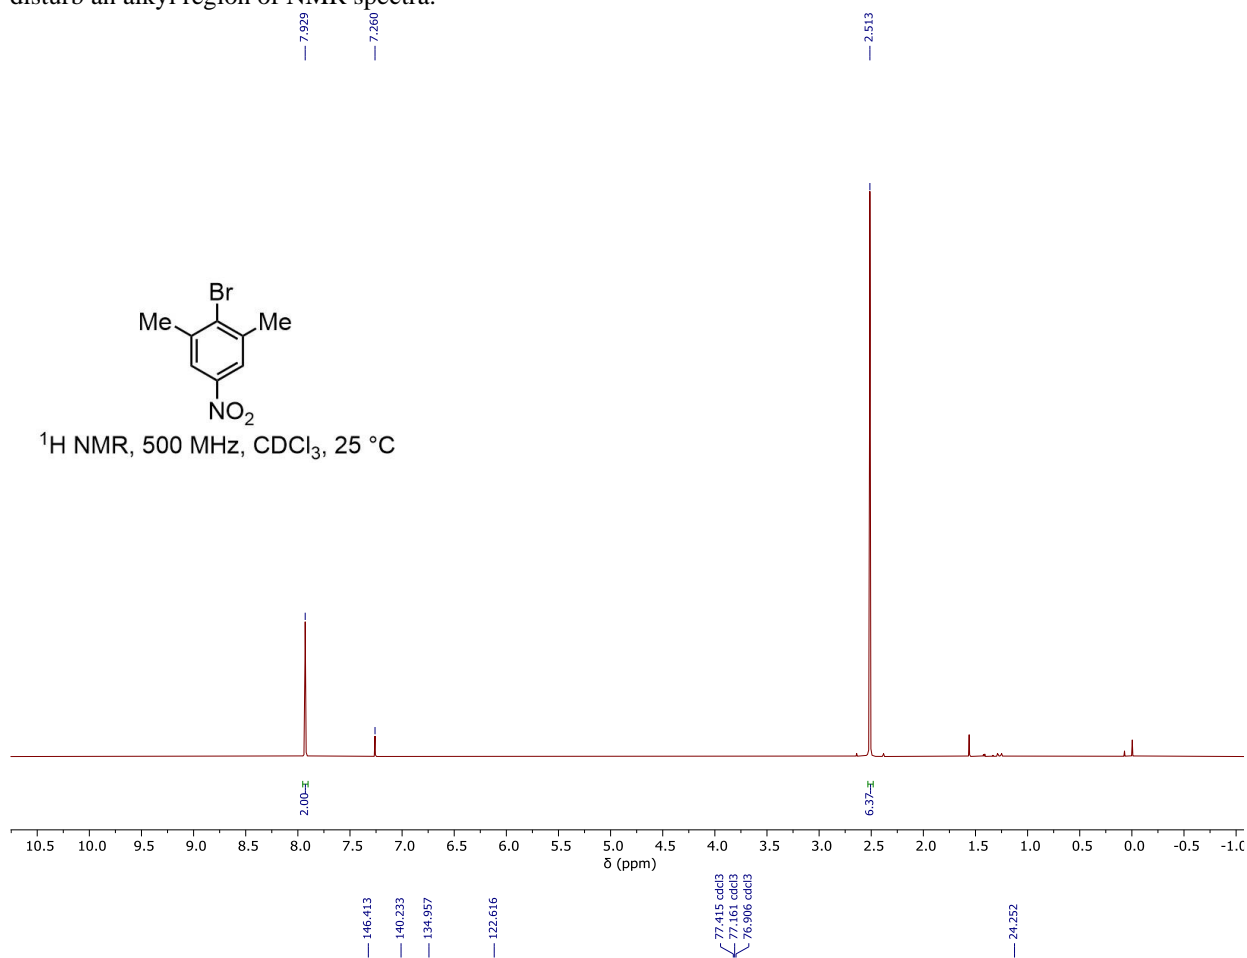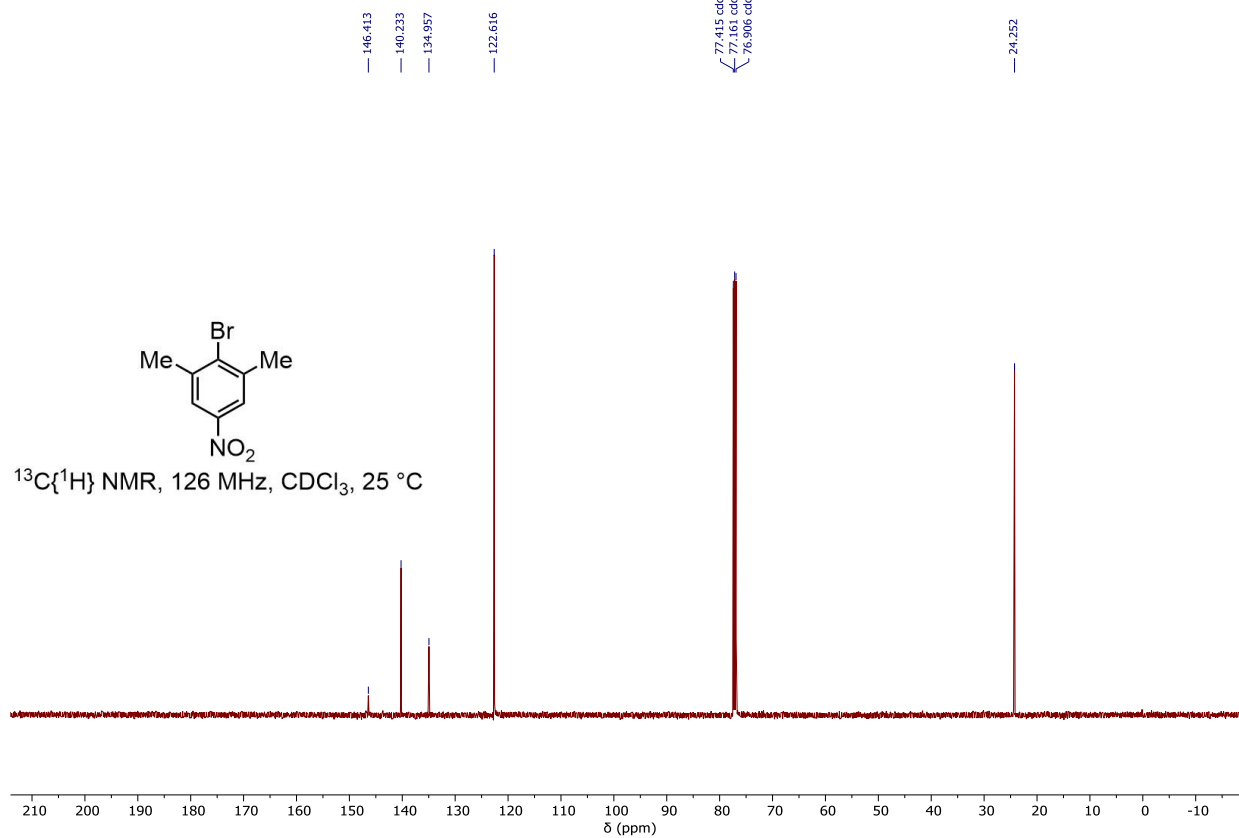

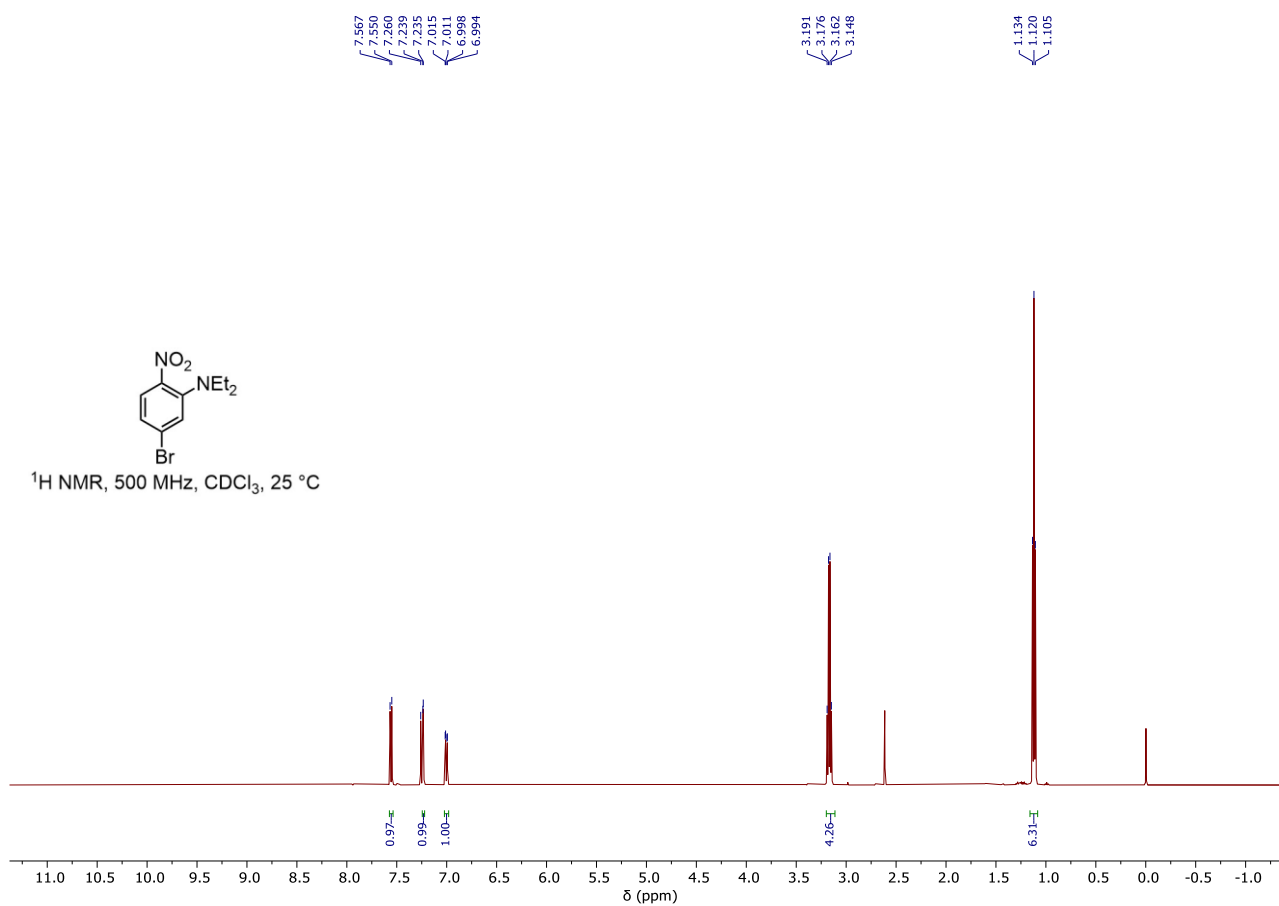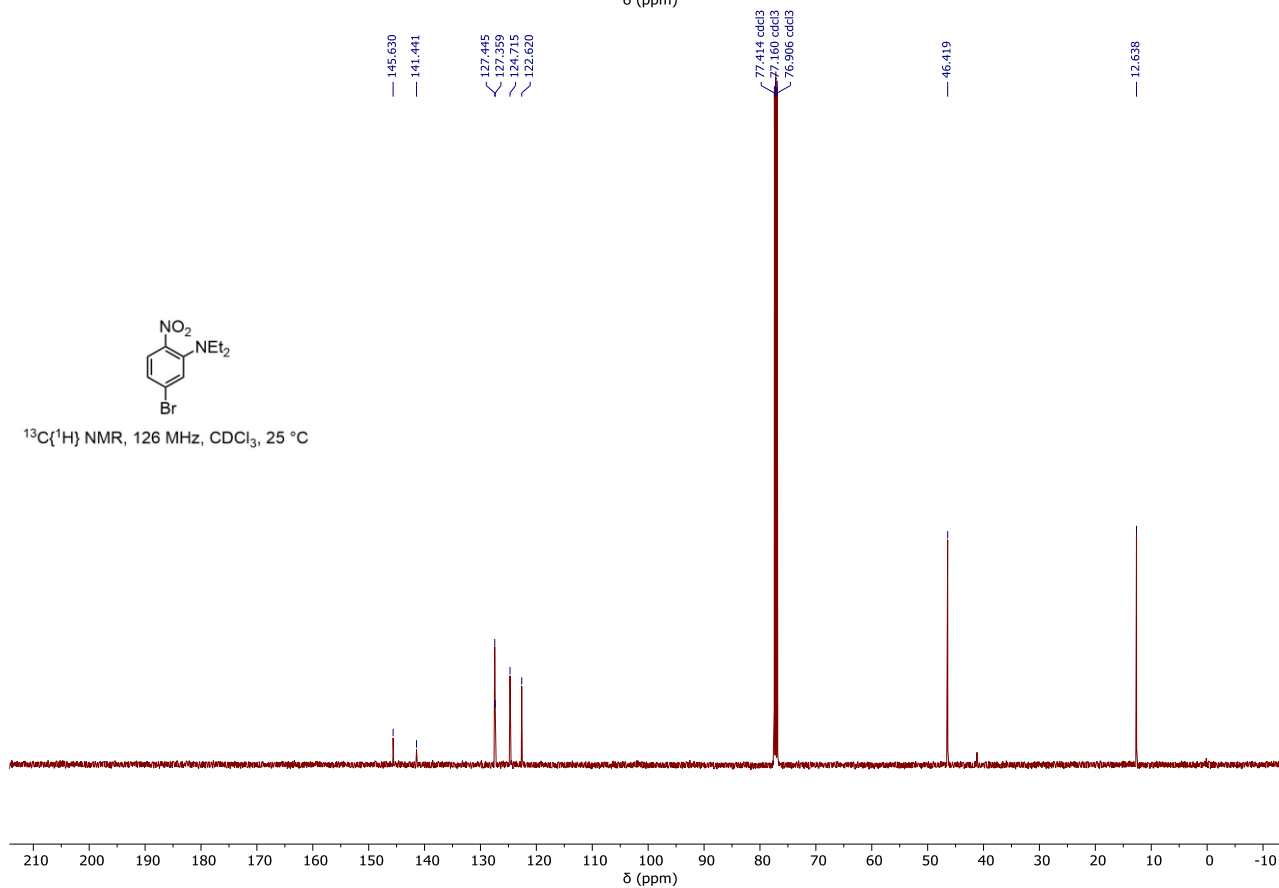

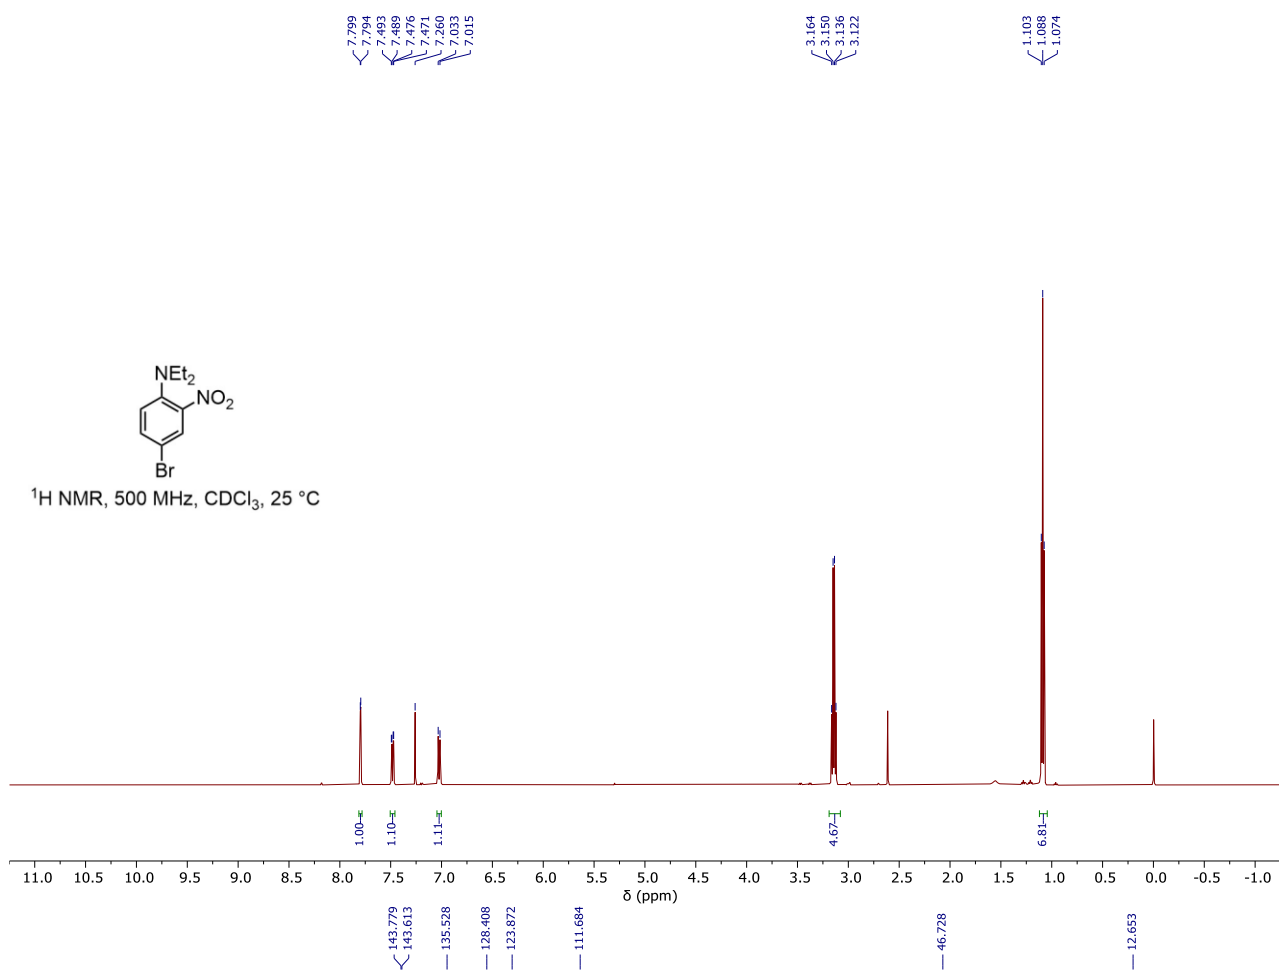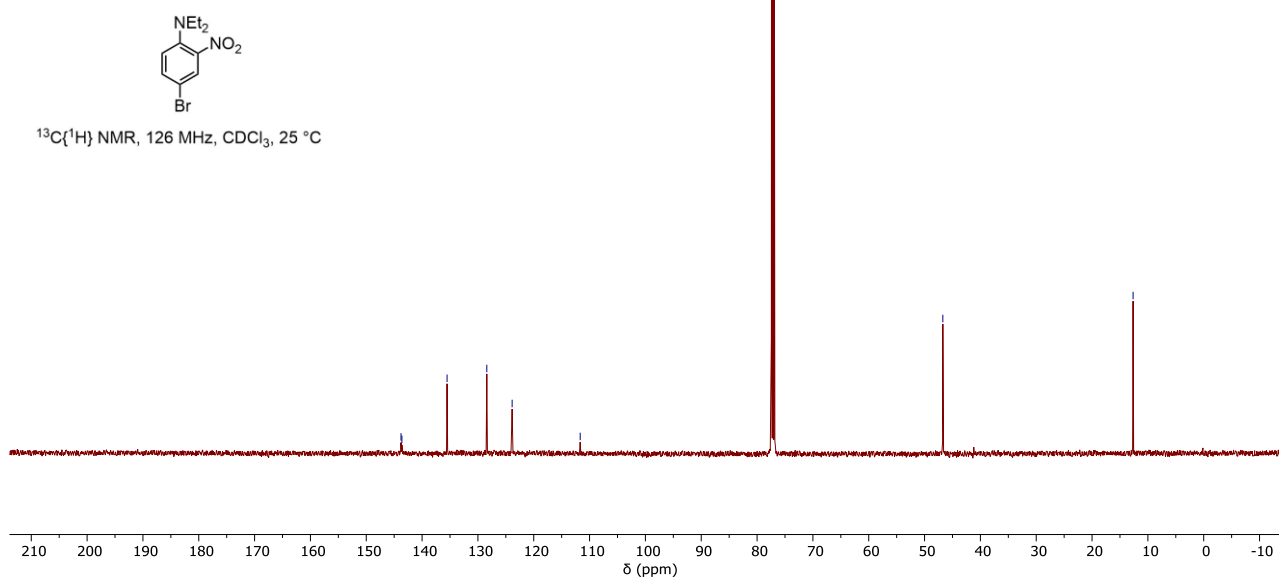

8.314  
8.310  
8.306  
8.296  
8.292  
7.719  
7.714  
7.710  
7.706  
7.698  
7.694  
7.639  
7.635  
7.626  
7.622  
7.500  
7.496  
7.486  
7.482  
7.260

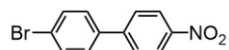

$^1\text{H}$  NMR, 500 MHz,  $\text{CDCl}_3$ , 25 °C

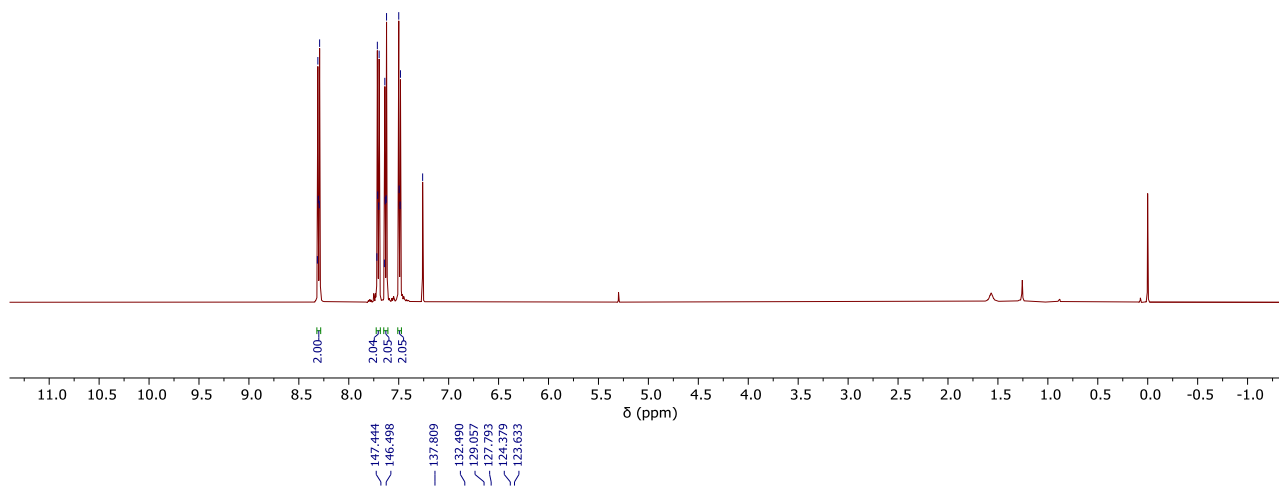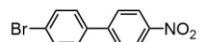

$^{13}\text{C}\{^1\text{H}\}$  NMR, 126 MHz,  $\text{CDCl}_3$ , 25 °C

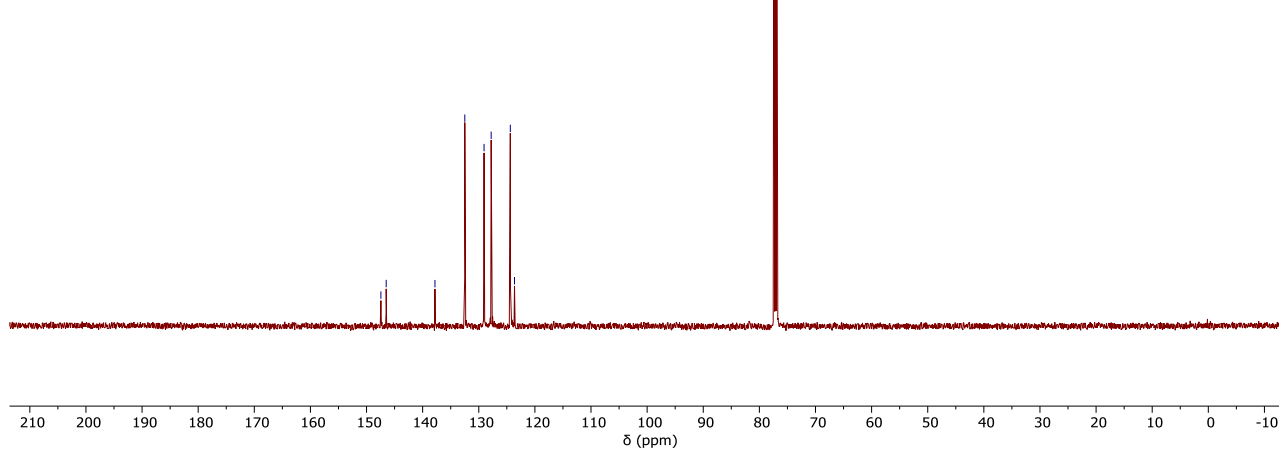

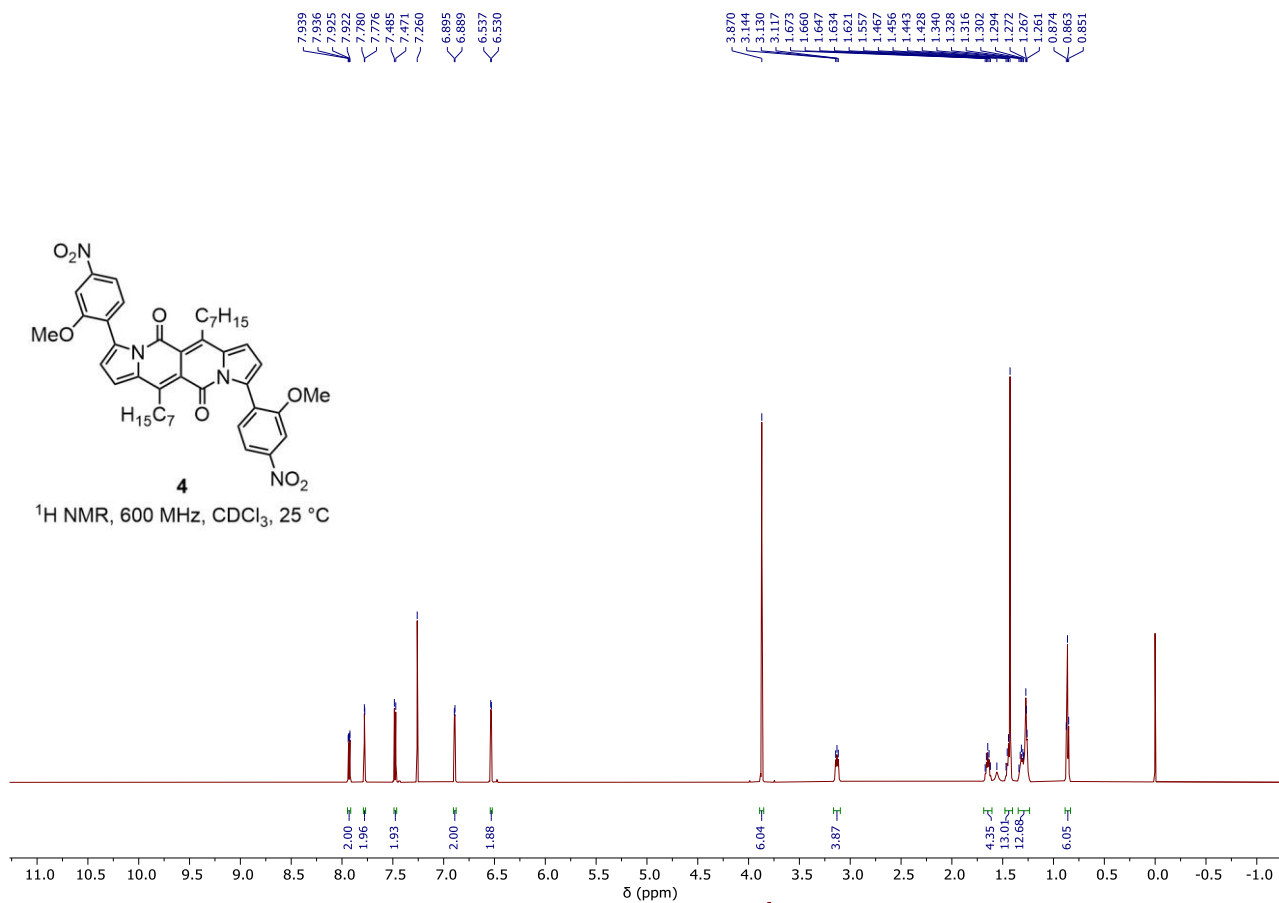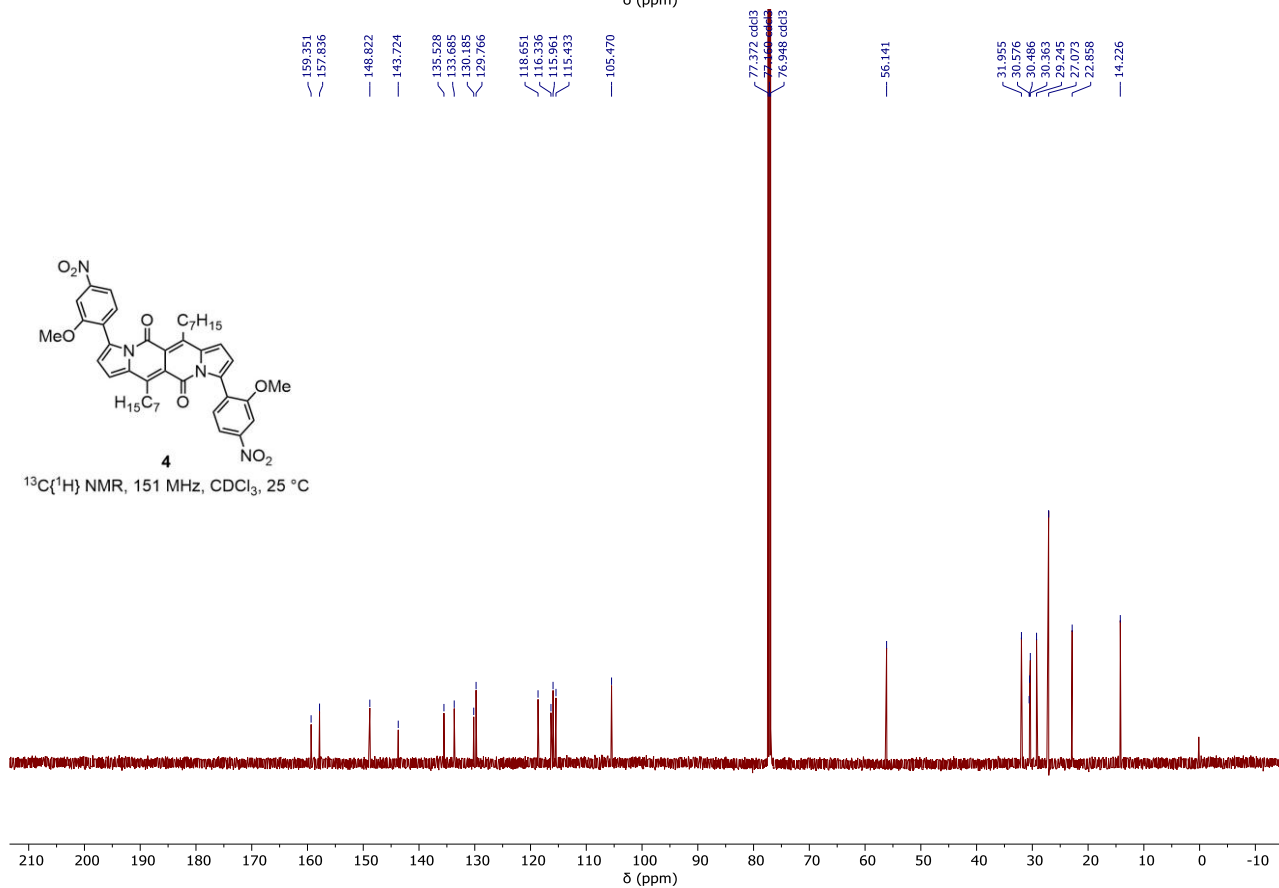

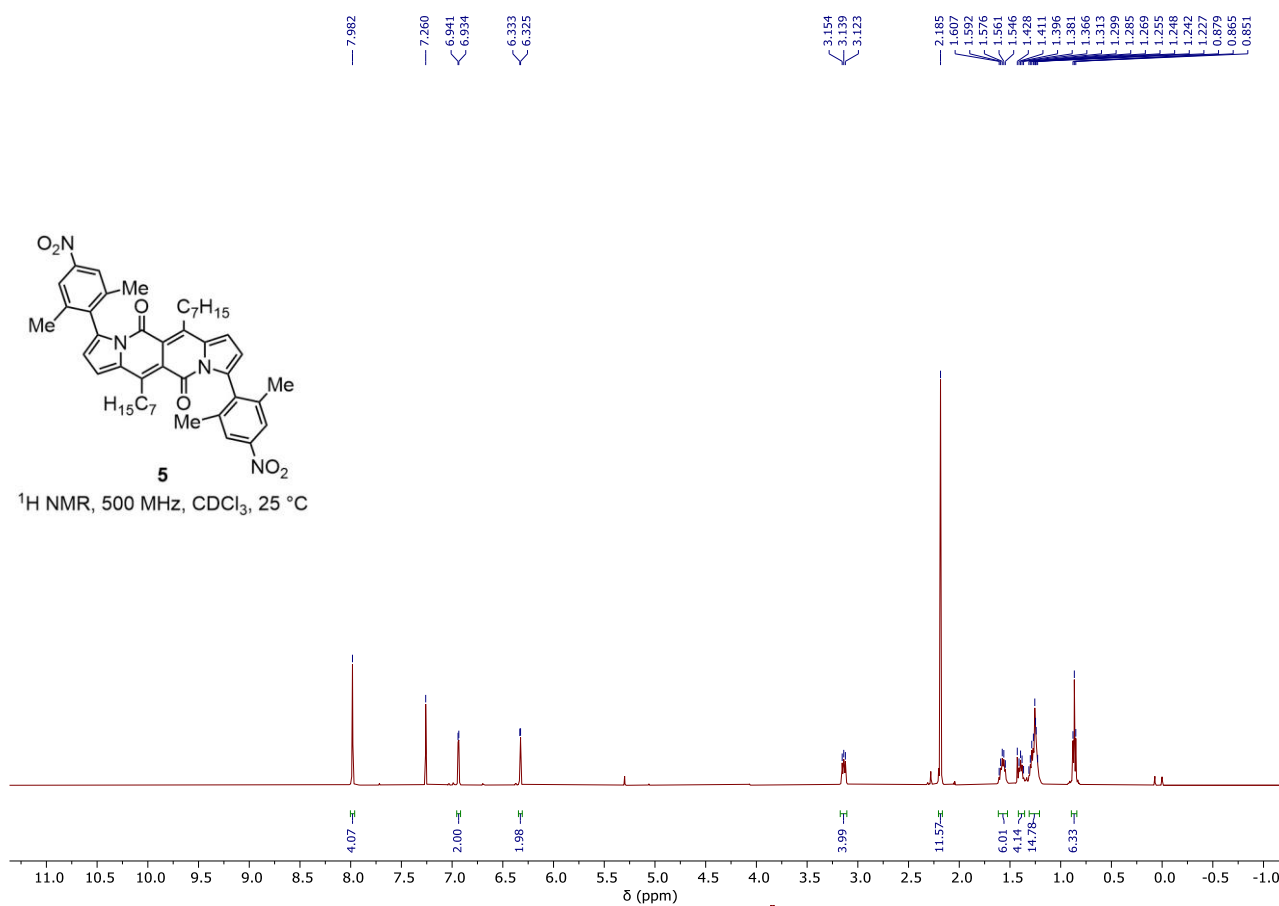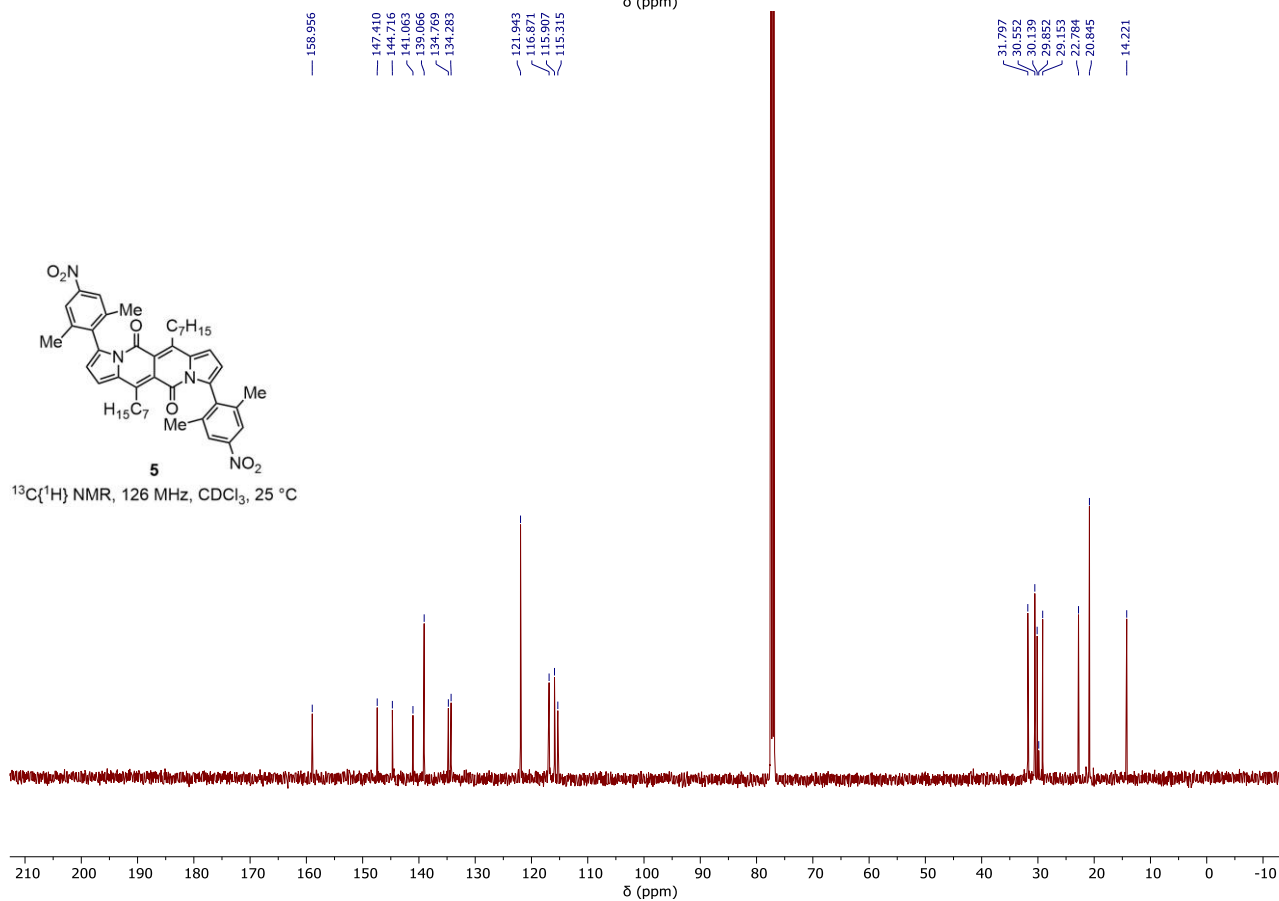

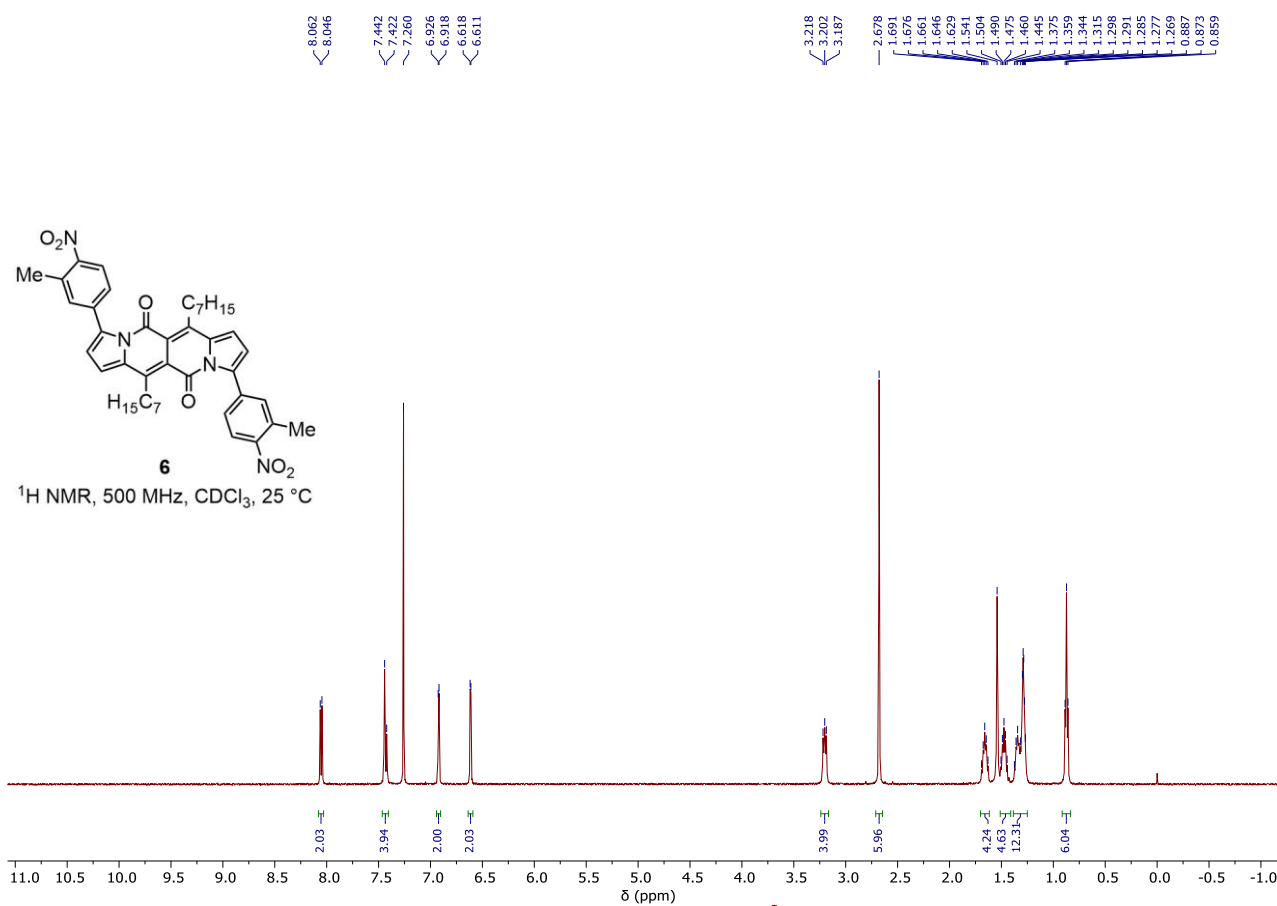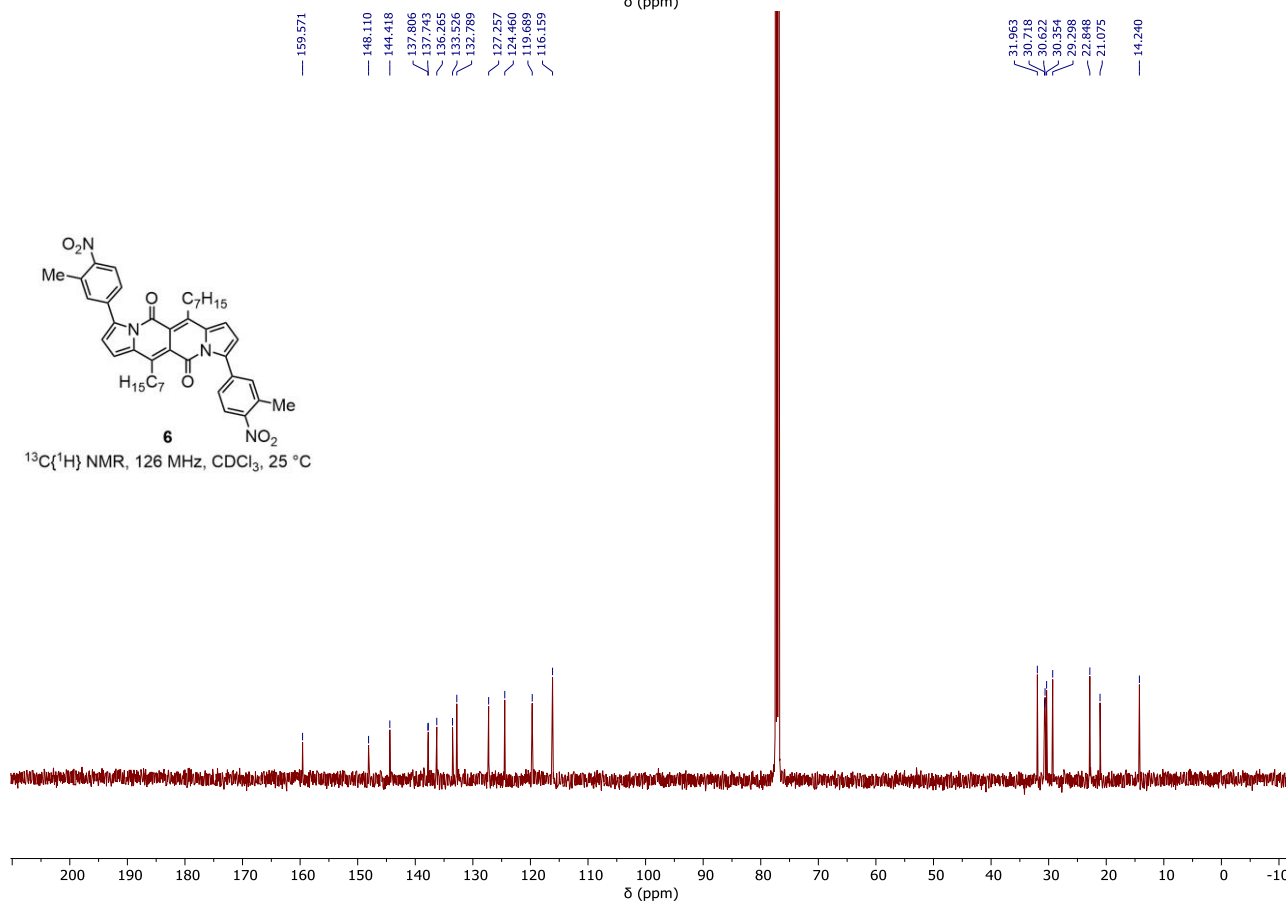

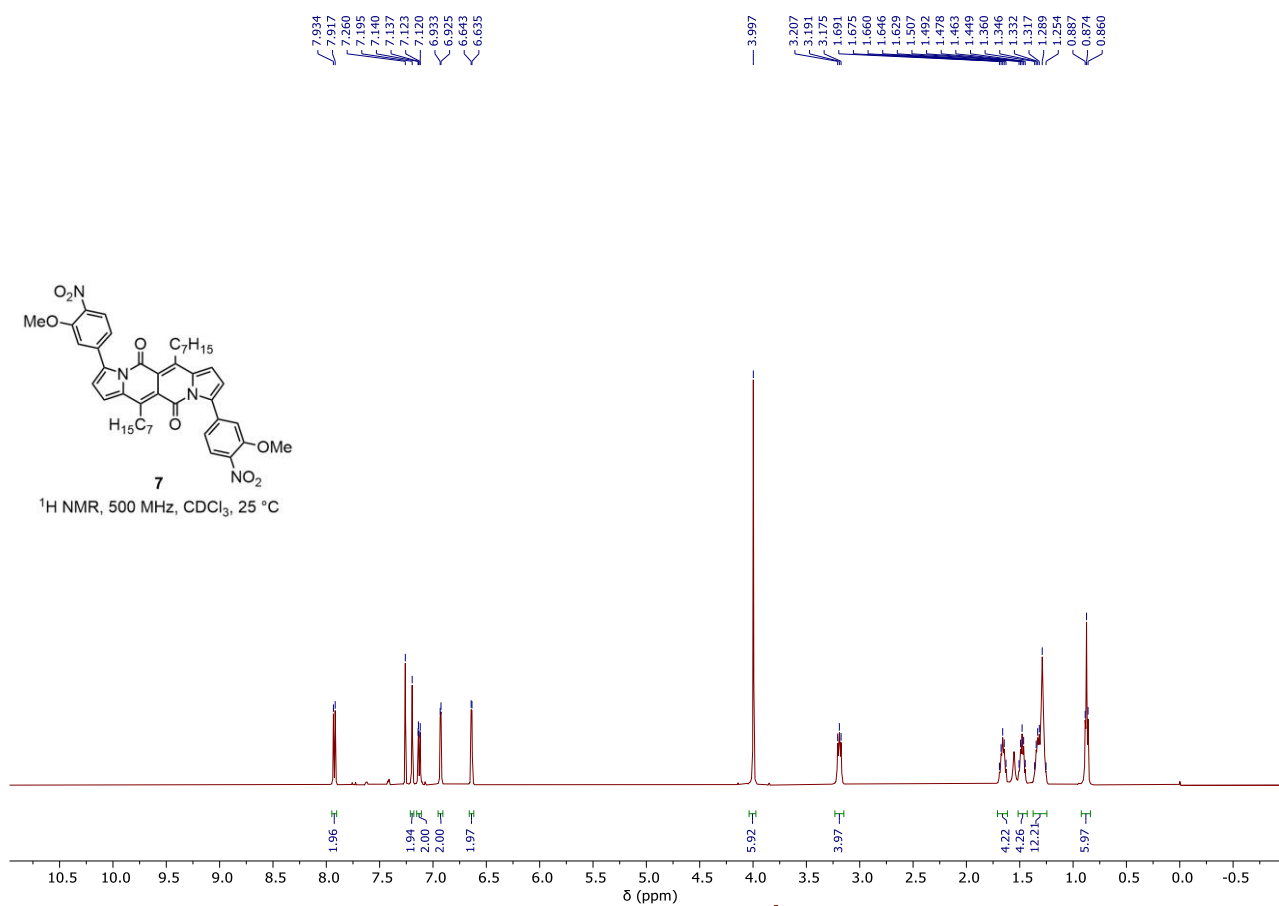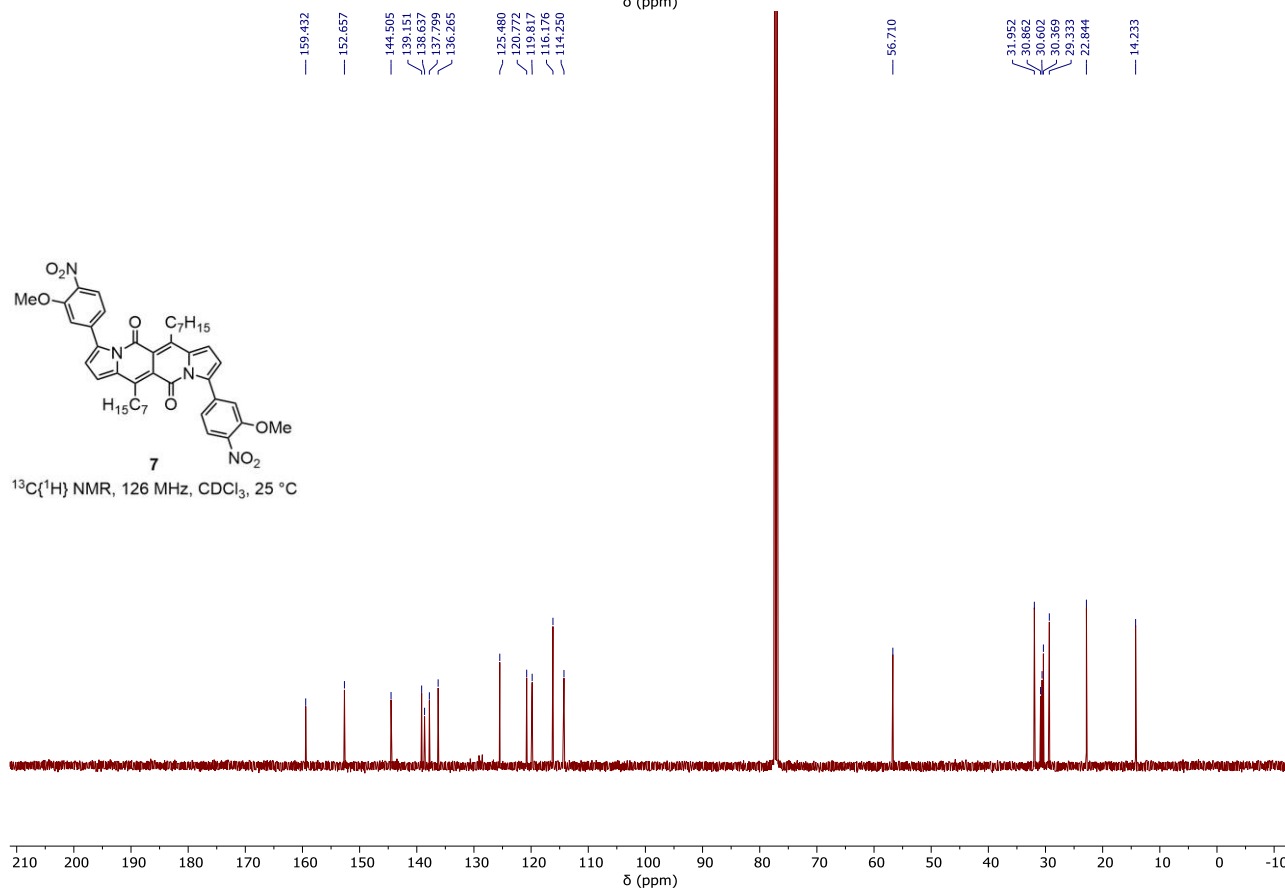

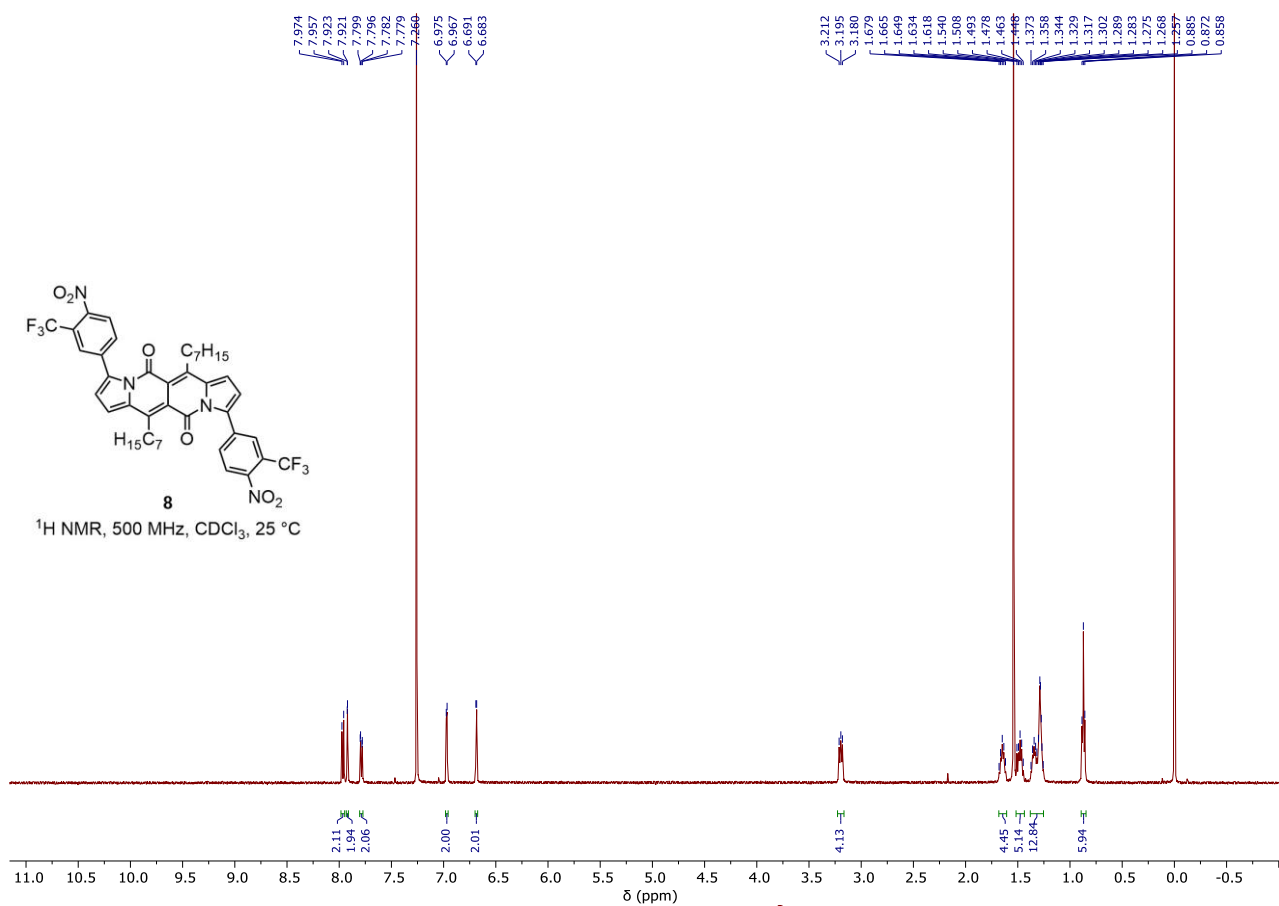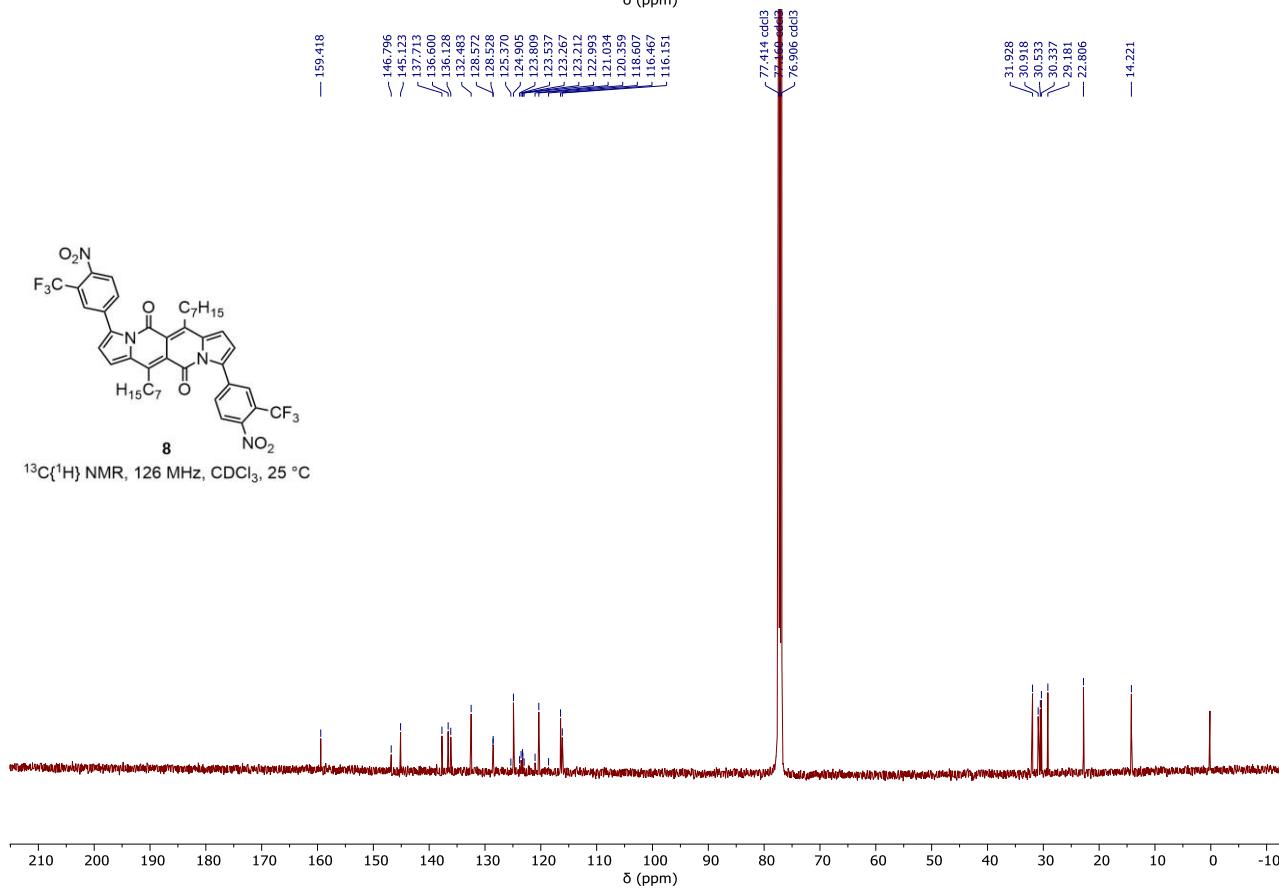

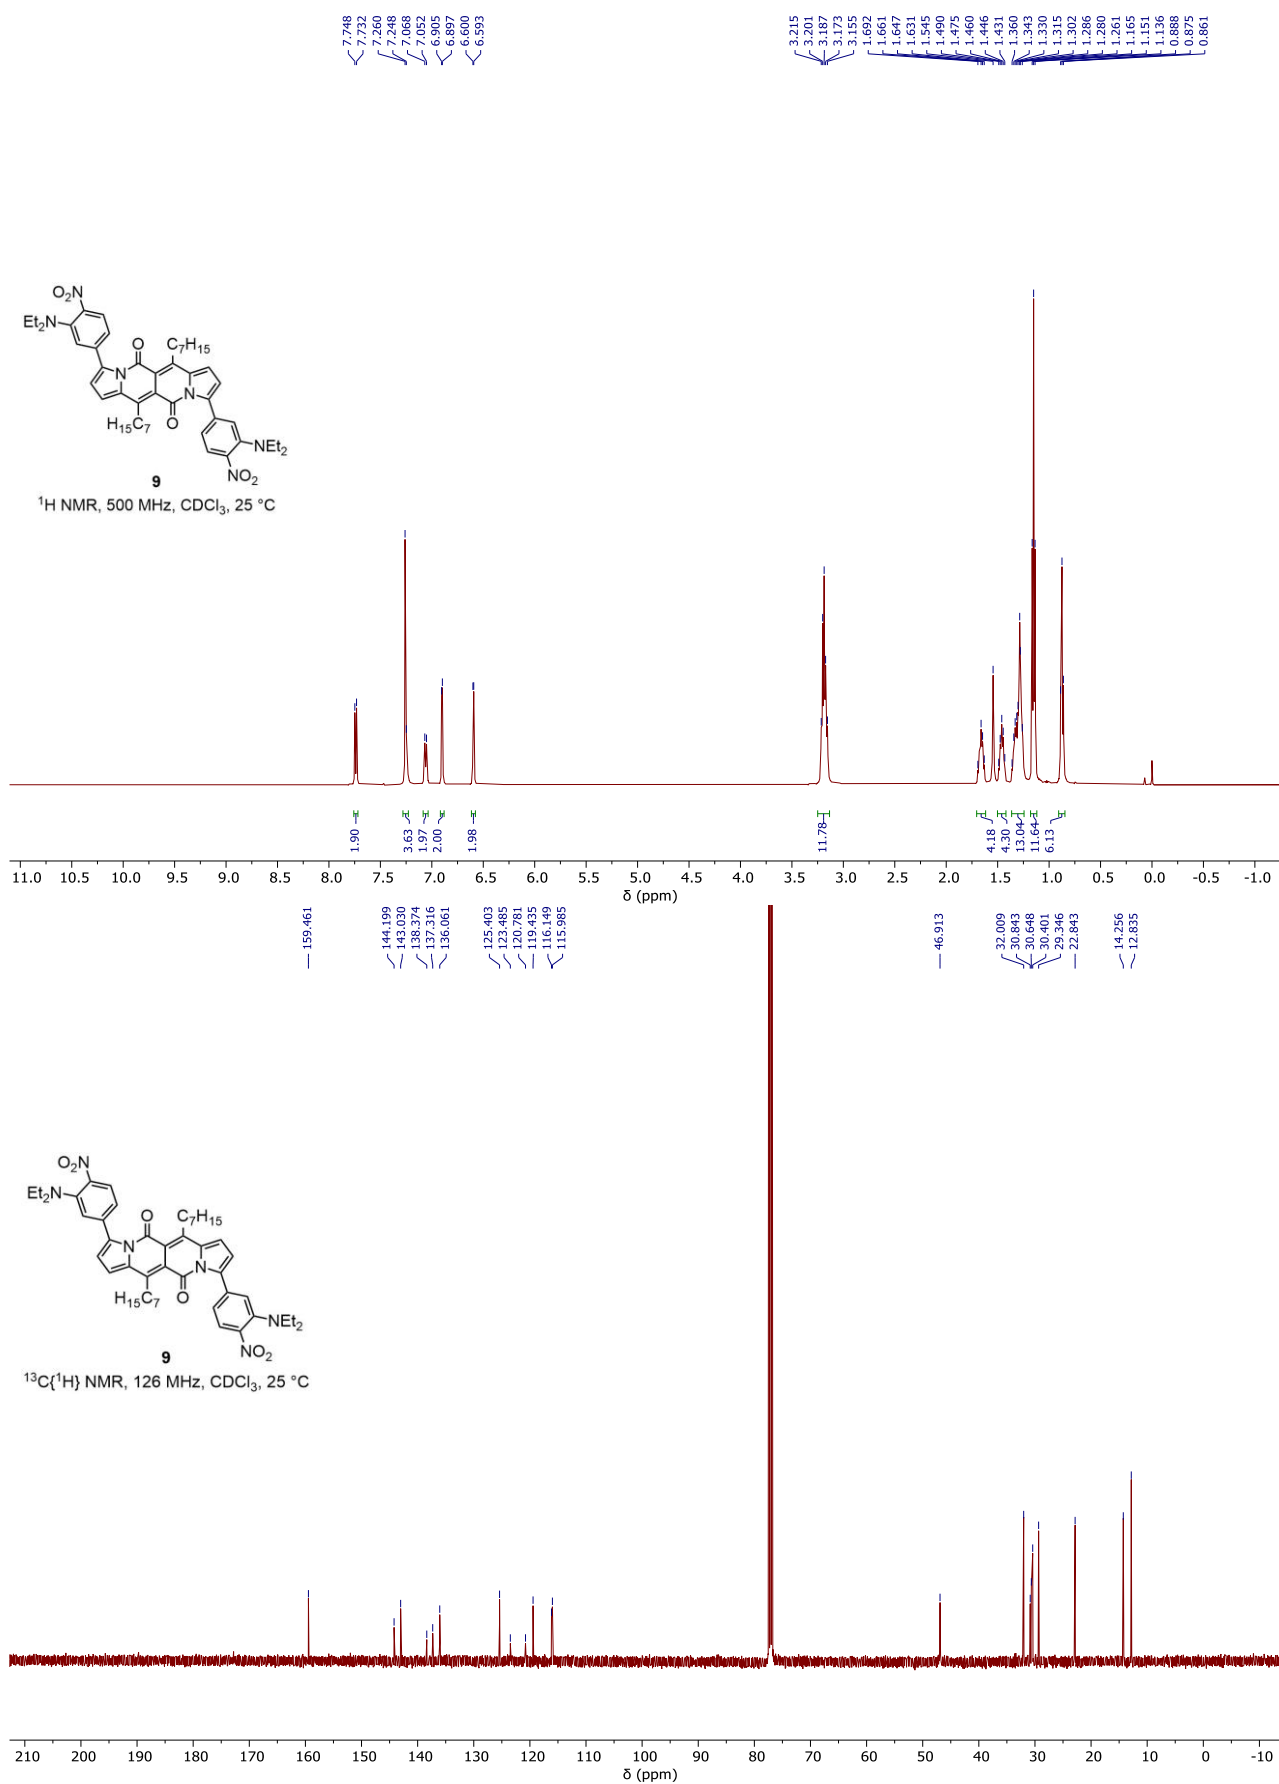

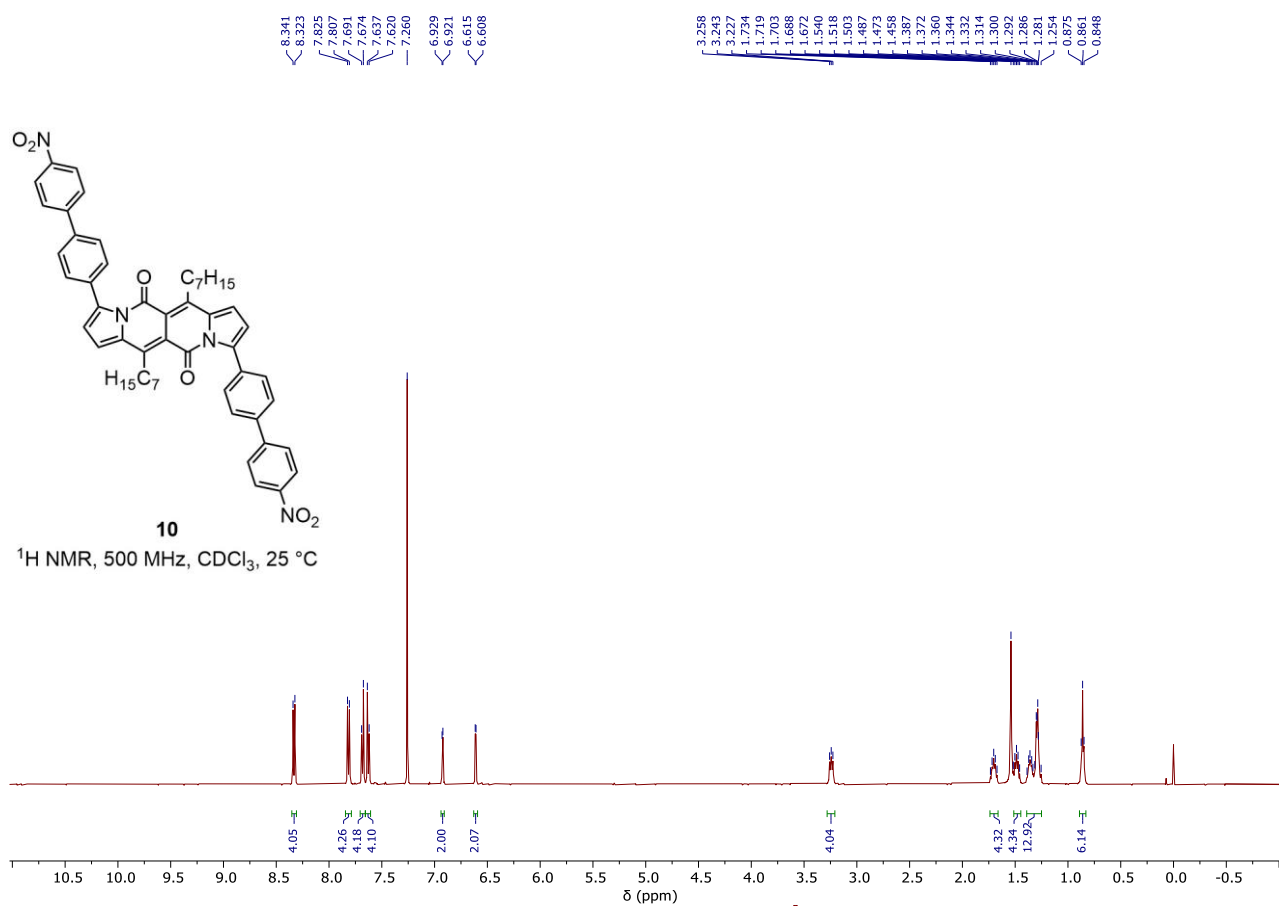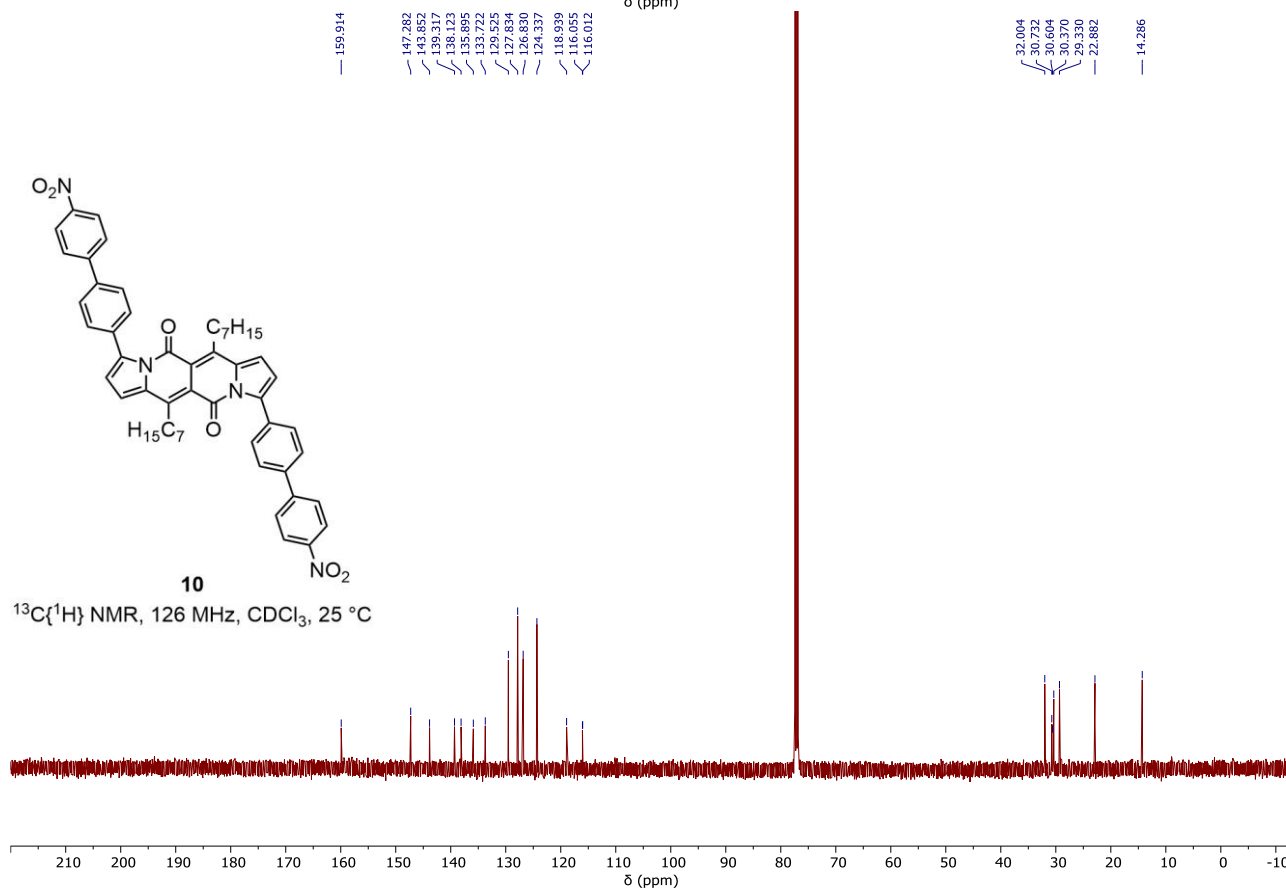

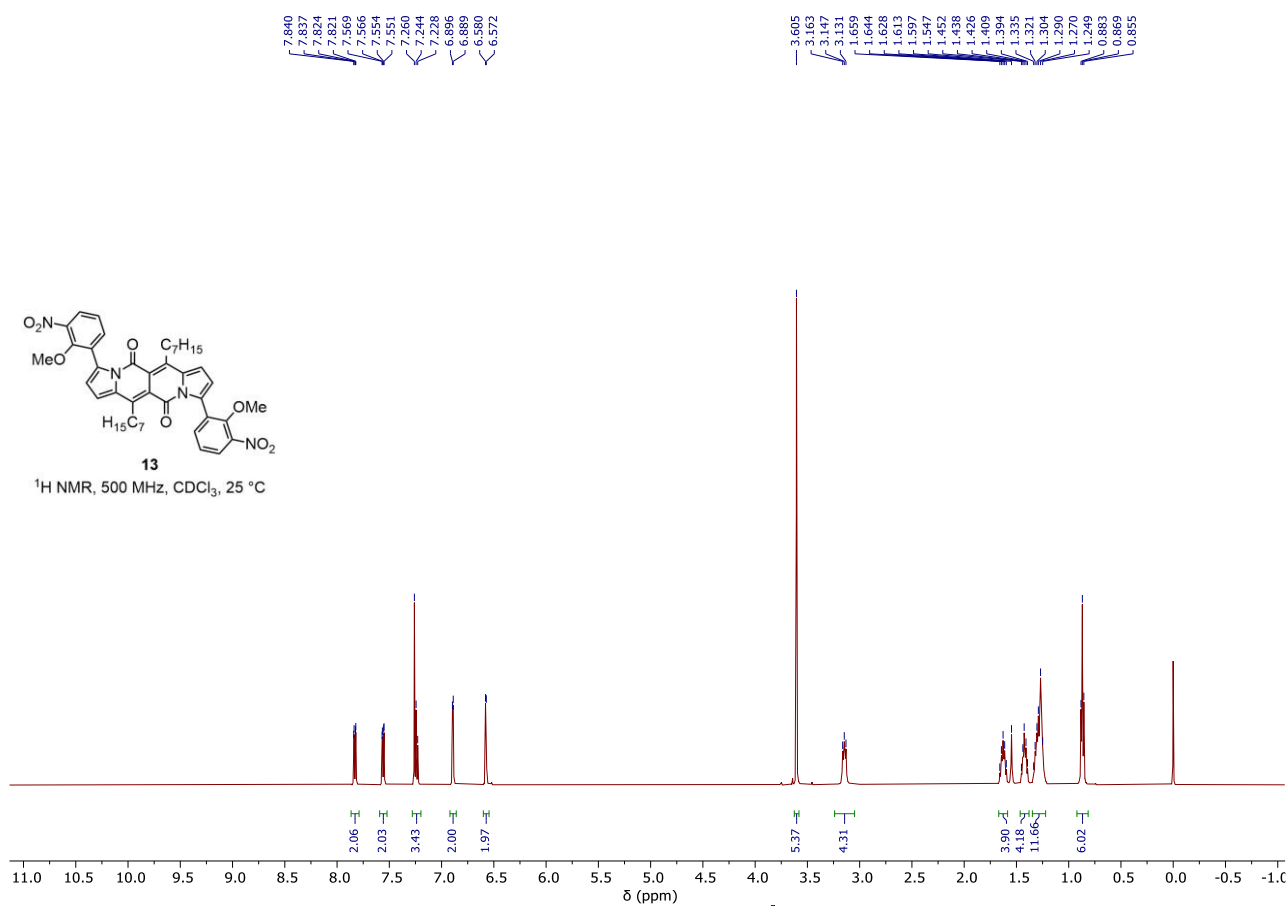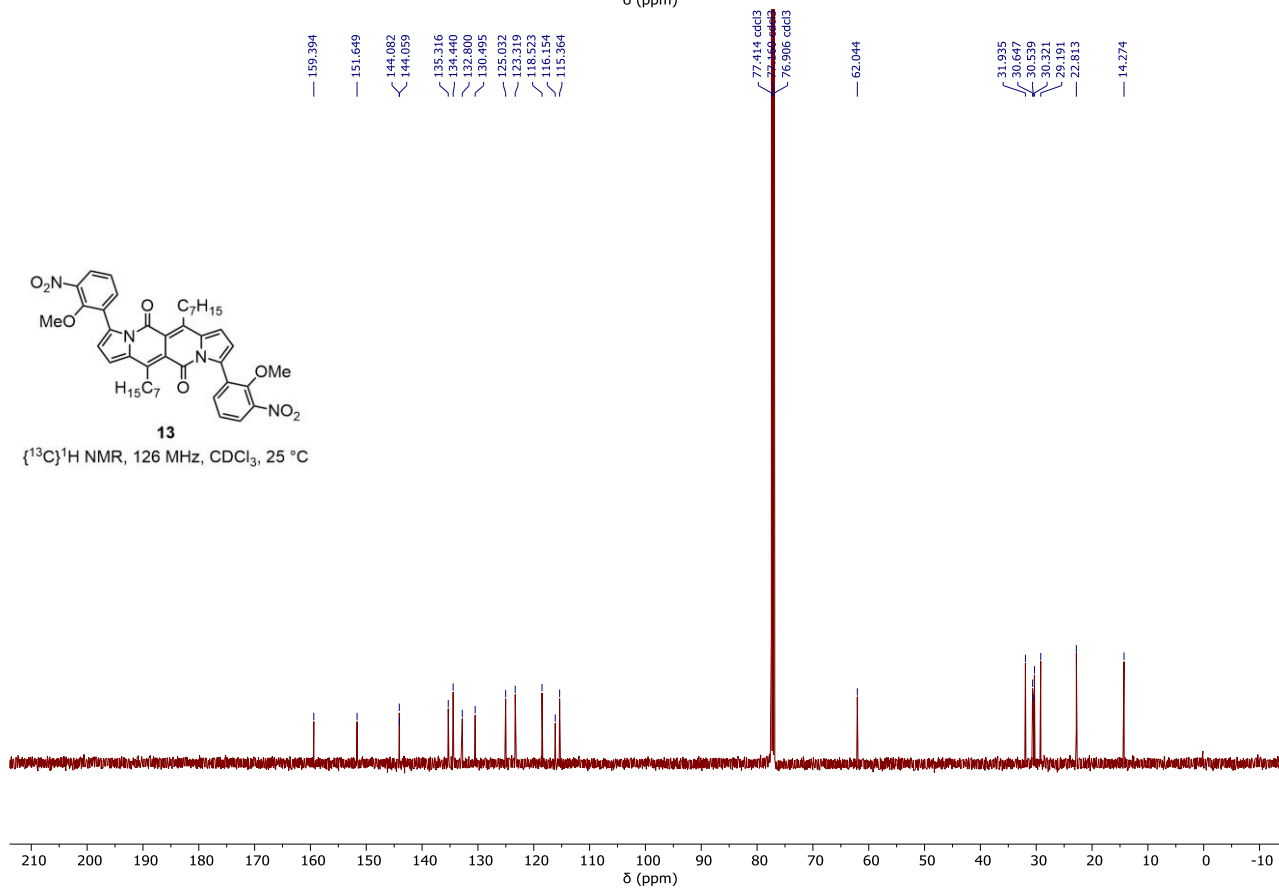

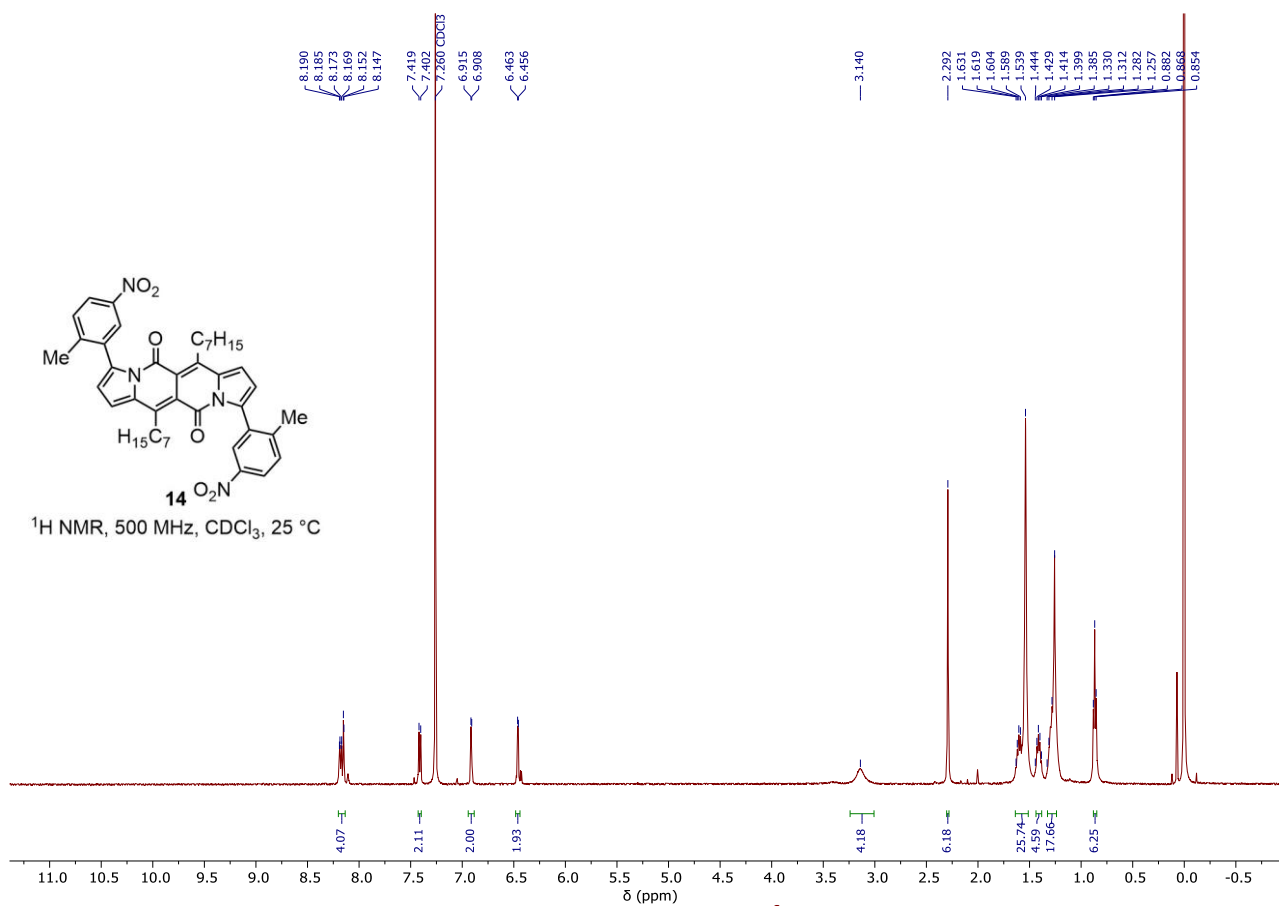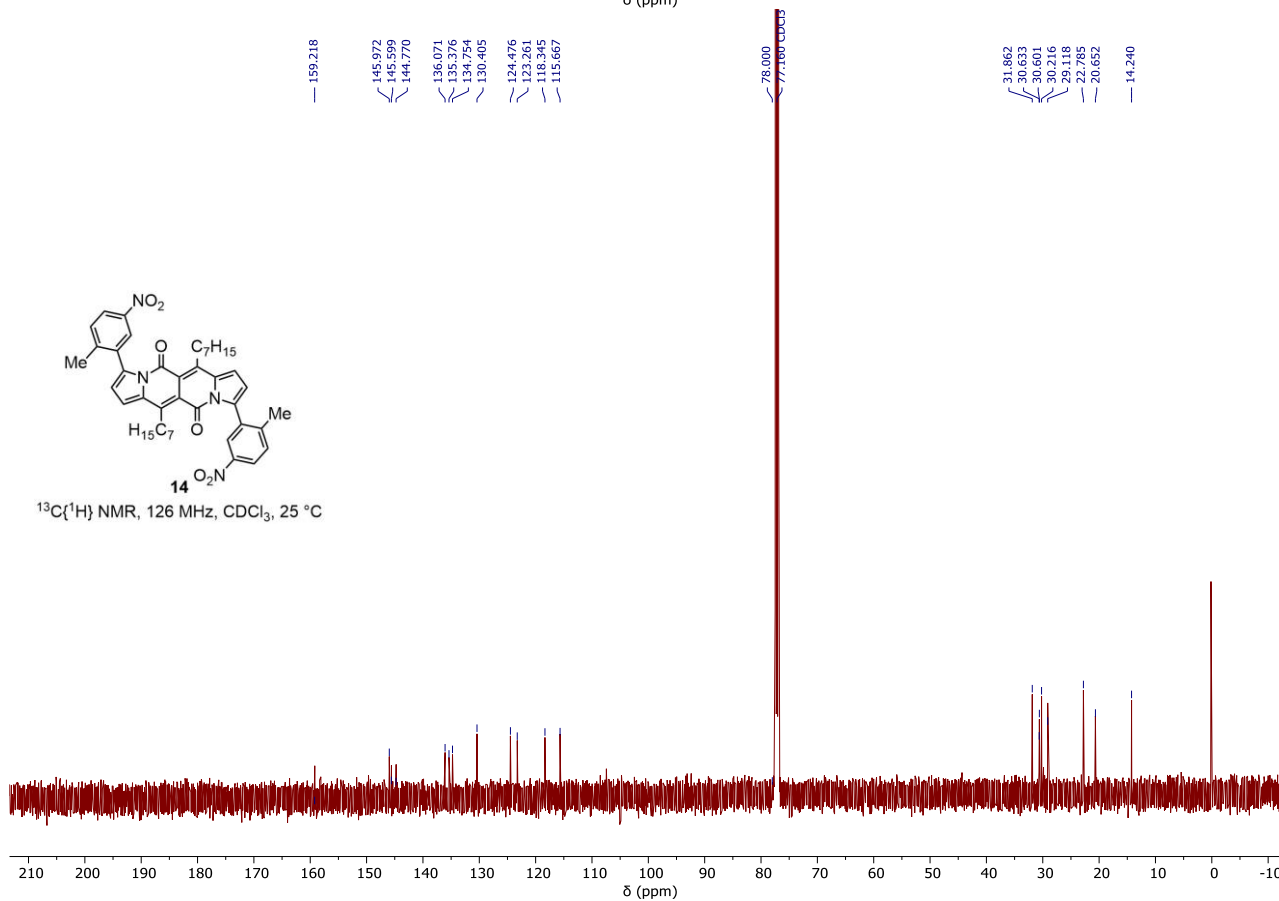



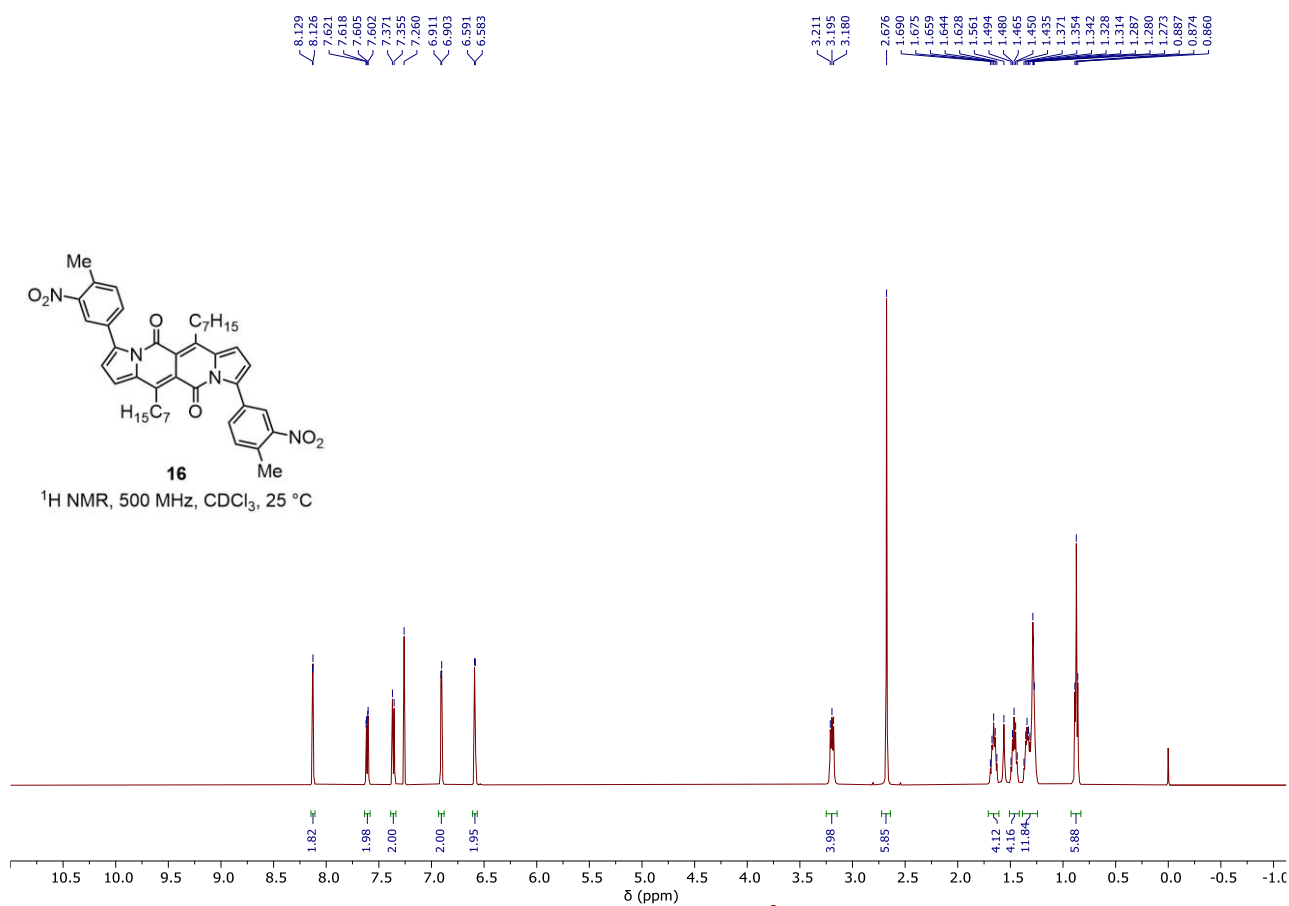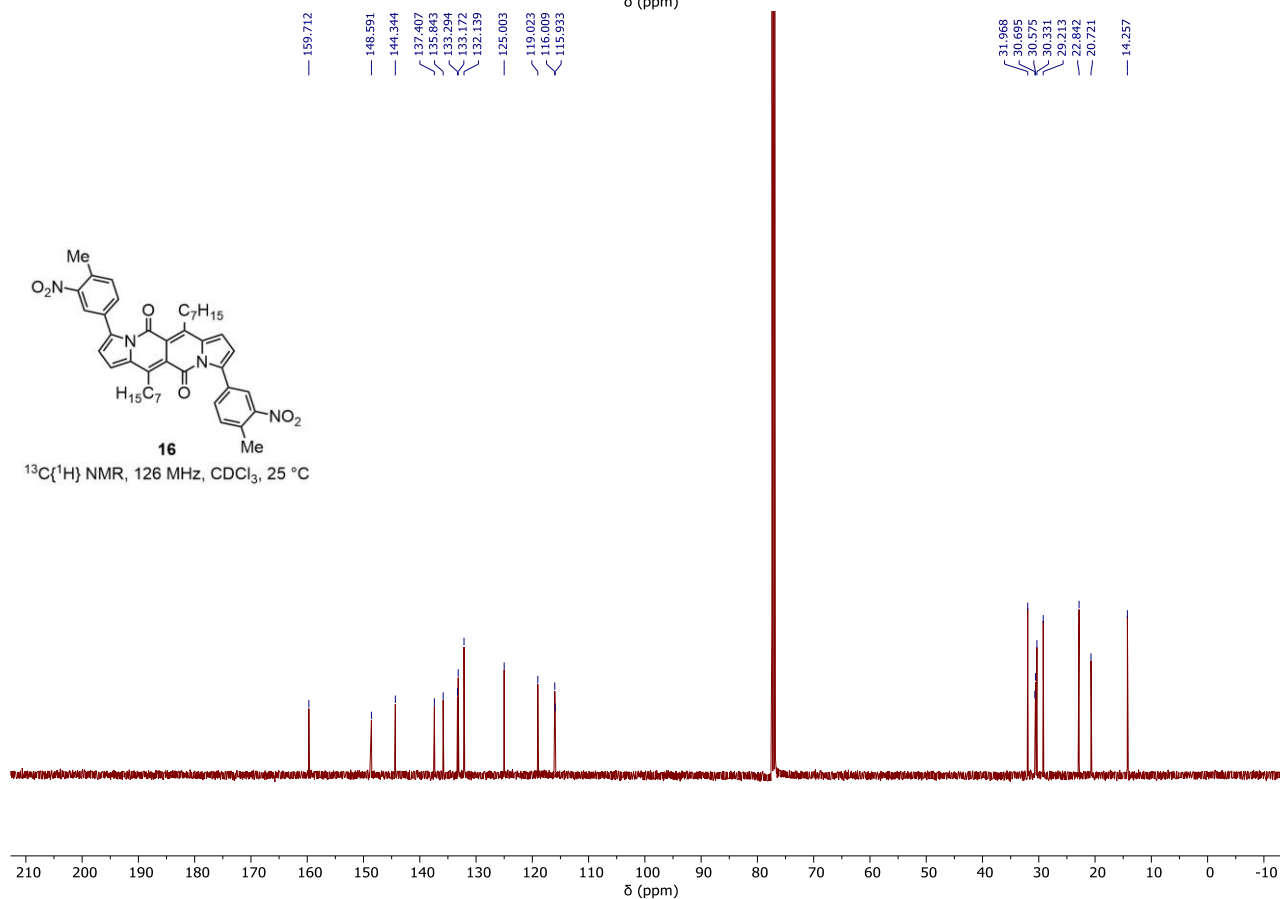

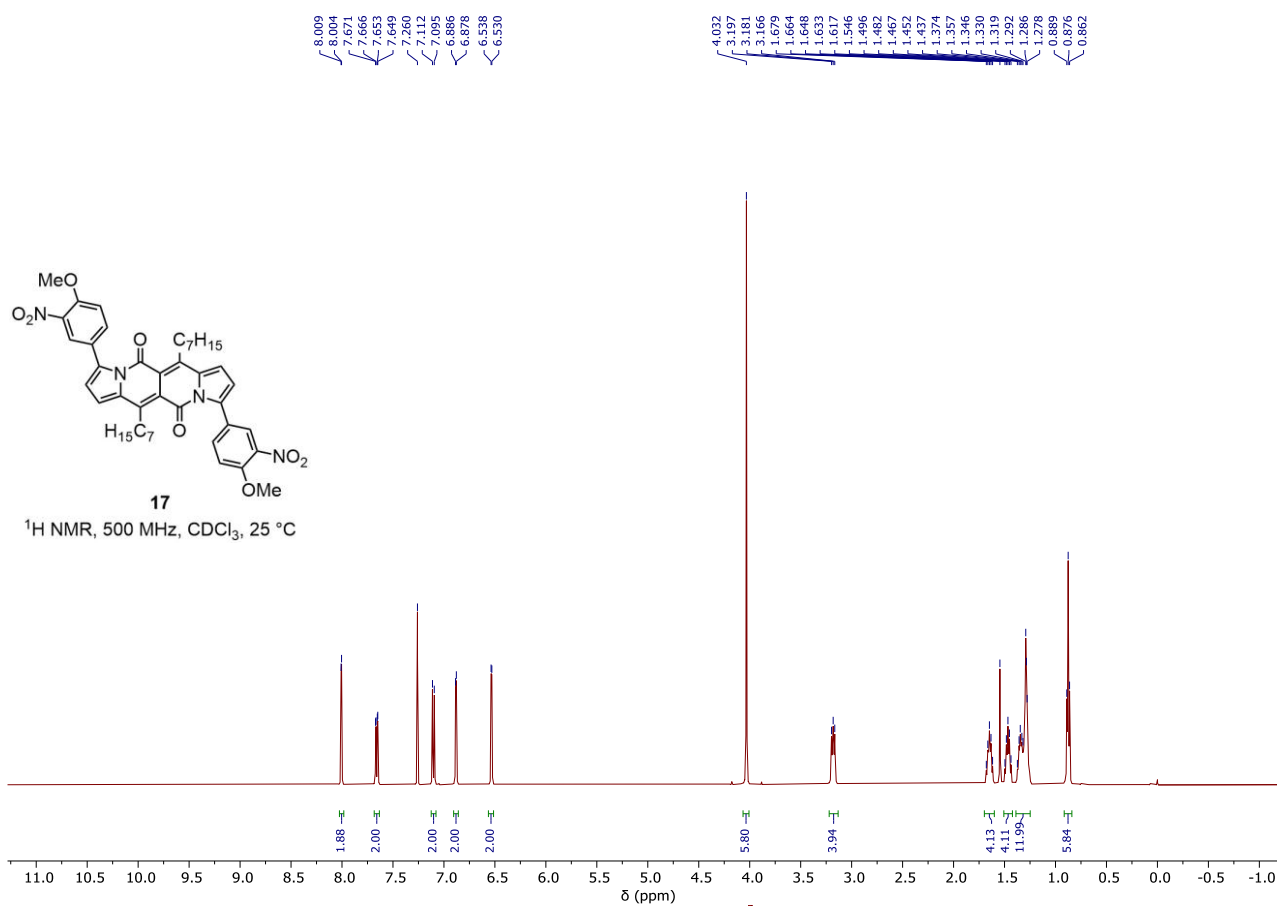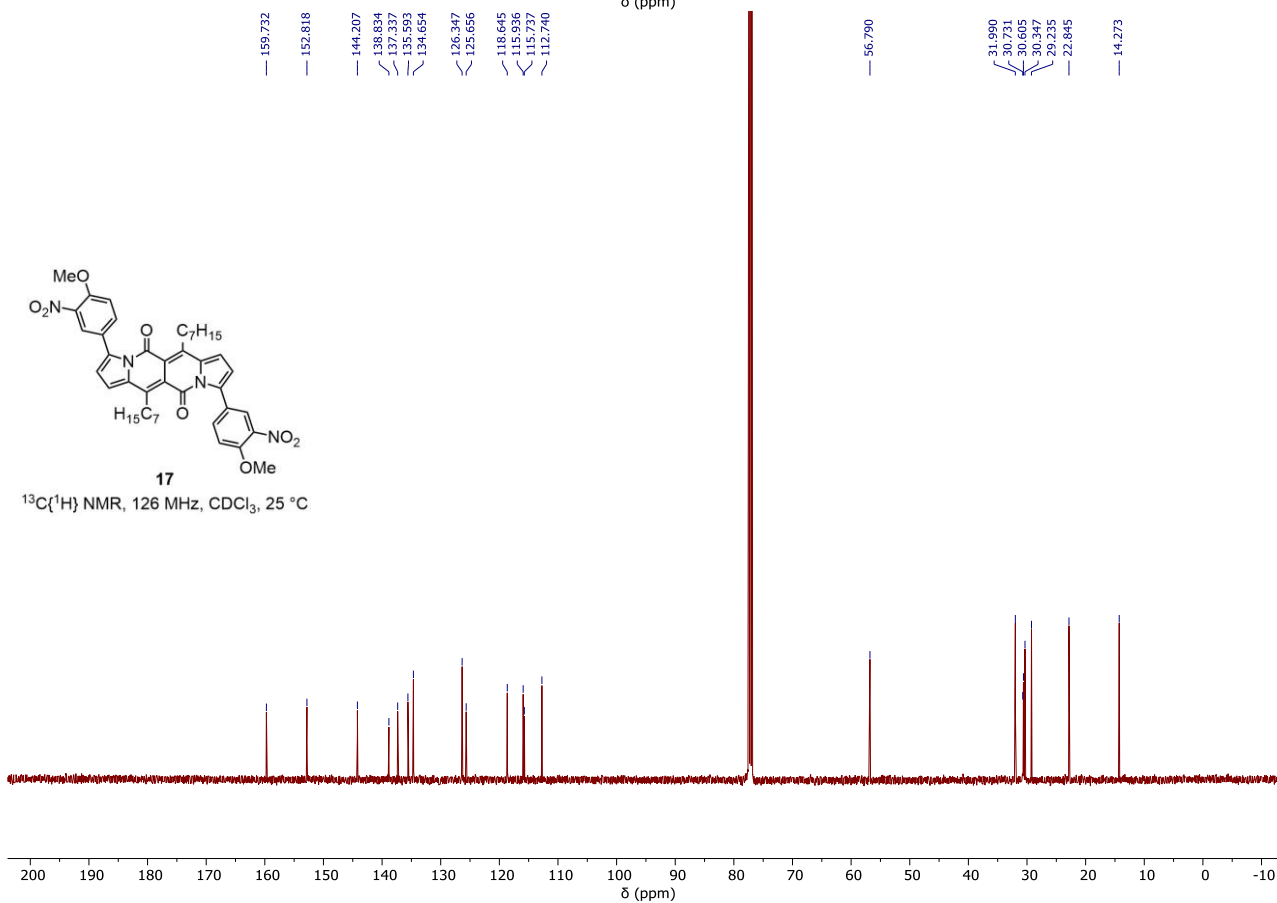

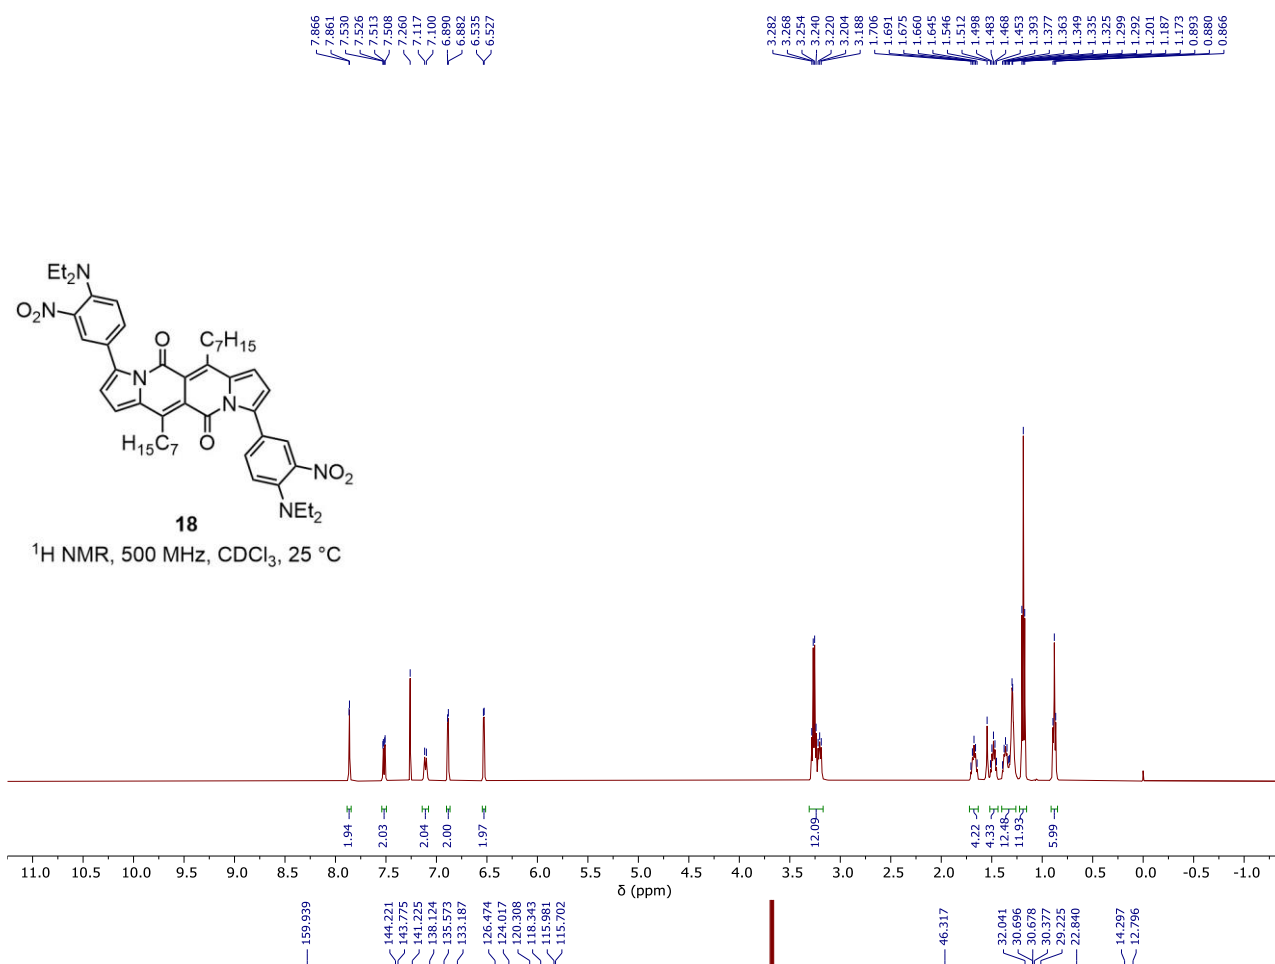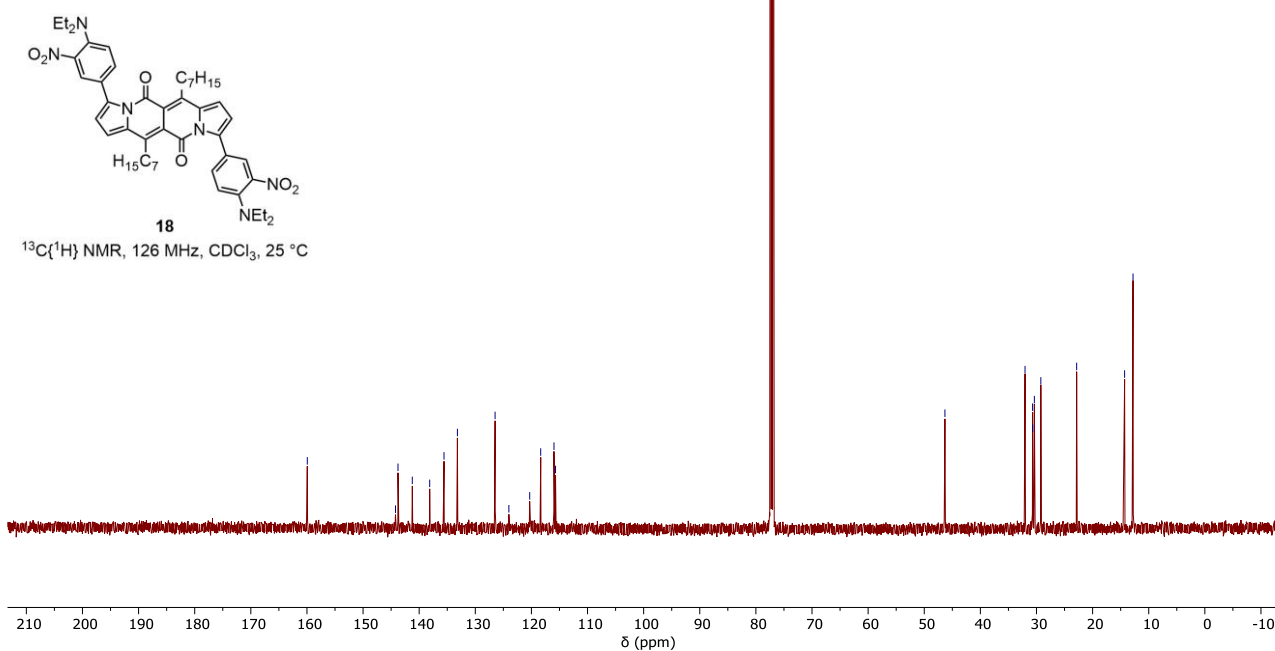

Supplement: d3cc03347c1.pdf [file d3cc03347c1.pdf]
